# Supplementary material
Source: HighWire-hosted journal article supplement (doi:10.1101/rna.067348.118)
Supplement: Supplemental_TableS1.xlsx [file Supplemental_TableS1.xlsx]

## Sheet: TableS1ForManuscript
peakid	Pos	name	gcoords	strand	OriginalClassification	Reclassification	Sequence	IsStringentMotif	IsRelaxedMotif	IsSecondaryStructure	IsInSafraTRMT6OEDataset	isSNP	numCAGEtags	MeanMisincorporationRate_Input	MeanMisincorporationRate_IP	MeanMisincorporationRate_Demethylase
NM_002165:7	7	NM_002165	chr20:30193092	+	none	TSS	NNNNNNNNNNNNNNNNNNNNNNNNACTCTCATTCCACGTTCTTAACTGTTCCATTTTCCG	FALSE	FALSE	FALSE	FALSE	FALSE	166	75	32.915	5.555
NM_004168:89	89	NM_004168	chr5:218426	+	none	TSS	CAGCTCGACCCCGGTGTGGTGCGCAGGCGCAGTCTGCGCAGGGACTGGCGGGACTGCGCG	FALSE	FALSE	TRUE	FALSE	FALSE	2	62.5	25.19	6.5
NM_004268:44	44	NM_004268	chr11:93517448	+	none	TSS	TAGGGAACCCTGGAGCTTCCGCGCCTGCCCAGTTTTGCTCCGAAAGACTTACCGAGGAGG	FALSE	FALSE	FALSE	FALSE	FALSE	6	53.33	17.33	2.73
NM_005778:12	12	NM_005778	chr3:50126352	+	none	TSS	NNNNNNNNNNNNNNNNNNNAAGCGTGAGGTACTGTGGGTAGGAGACGGCCGTCGGCGGAG	FALSE	FALSE	FALSE	FALSE	FALSE	32	50	15.06	3.84
NM_031314:38	38	NM_031314	chr14:21737601	-	none	TSS	GGGCGGGGACTAGGCCTTCGCCTCGGCGGCAGAGGAGACTCGGGGGCCATTTTGTGAAGA	FALSE	FALSE	FALSE	FALSE	FALSE	1931	45.83	14.715	2.5
NM_003900:64	64	NM_003900	chr5:179247905	+	none	TSS	TACAAAAGCCGCGCGGCGGCTGCGACCGGGACGGCCCGTTTTCCGCCAGCTCGCCGCTCG	FALSE	FALSE	FALSE	FALSE	FALSE	1061	37.6	34.065	9.27
NM_016343:7	7	NM_016343	chr1:214776538	+	none	TSS	NNNNNNNNNNNNNNNNNNNNNNNNGAGACCAGAAGCGGGCGAATTGGGCACCGGTGGCGG	FALSE	FALSE	FALSE	FALSE	FALSE	192	35	15.685	1.515
NM_006892:1	1	NM_006892	chr20:31350191	+	TSS	TSS	NNNNNNNNNNNNNNNNNNNNNNNNNNNNNNACCCACTCCCGCTGCCCCGTCCGGCCCGCG	FALSE	FALSE	FALSE	FALSE	FALSE	3	33.33	28.115	7.125
NM_001271735:50	50	NM_001271735	chr12:54718923	+	none	TSS	AATCAGCGGCGGCGTTTCTTTTGCGGCTCCACGTCGGCACCAGCTGCGGGGCAAGATGGA	FALSE	TRUE	FALSE	FALSE	FALSE	4654	31.055	20.195	5.525
NR_026936:185	185	NR_026936	chr5:95188120	+	none	TSS	AGACTACGAACCCACCGGGAGGAACGAACAACTCCAGATGCGCCACCTTAAGAGCTGTAA	FALSE	FALSE	FALSE	FALSE	FALSE	0	30.3	50	12.495
NM_002370:68	68	NM_002370	chr1:53704215	-	none	TSS	CTCCACGCAGCGACGACGGGACCTGACGTCACTTCCGCGCGCCGCCGCAAACGTCAGTGT	FALSE	FALSE	TRUE	FALSE	FALSE	1	29.165	20.925	1.85
NM_015665:19	19	NM_015665	chr12:53715394	-	none	TSS	NNNNNNNNNNNNCCCGTTAGTCTTTTCTTCACTTCCGTTGAGTTCCGCCTCGCCGTTTGT	FALSE	FALSE	FALSE	FALSE	FALSE	10	28.2	15.835	0
NM_001185024:105	105	NM_001185024	chr22:20119468	+	none	TSS	CCCGGGGAGGGATGCGGCGGCGCGGCGCCCAGGATGCCCCGCAGCCCCGGGACGCGCCTC	FALSE	FALSE	FALSE	FALSE	FALSE	0	27.775	20.895	2.63
NM_001310315:6	6	NM_001310315	chr6:3157778	-	none	TSS	NNNNNNNNNNNNNNNNNNNNNNNNNGCGGCAGGTCTCTGCGCAGCCCAGCCCGCCGGTCC	FALSE	FALSE	FALSE	FALSE	FALSE	177	26.09	20.615	4.385
NM_001020658:1	1	NM_001020658	chr1:31538564	-	TSS	TSS	NNNNNNNNNNNNNNNNNNNNNNNNNNNNNNAGTGGGCCGCCATGTTGTCGGAGTGAAAGG	FALSE	FALSE	FALSE	FALSE	FALSE	104	25	16.755	3.66
NM_015316:16	16	NM_015316	chr14:104313912	-	none	TSS	NNNNNNNNNNNNNNNGGGCGGGCGGGCCGCAGGCTGTCGGGCTGGGGCTGAGGCTGAGGC	FALSE	FALSE	FALSE	FALSE	FALSE	2	25	22.205	5.695
NM_018067:188	188	NM_018067	chr1:36621753	+	none	TSS	CAGCGAGAGGCCAGGCCCAGCCCGGGCGGTACAATAGGGTTGGGCCGAGGCCGGGACTGG	FALSE	FALSE	FALSE	FALSE	FALSE	1	25	21.63	2
NM_021100:14	14	NM_021100	chr20:34287274	-	none	TSS	NNNNNNNNNNNNNNNNNAGCGCCGGGCAGCACTTCCGGGAGCCTGGGGCCCAGGACTGCA	FALSE	FALSE	FALSE	FALSE	FALSE	9	25	28.78	6.475
NR_046262:1	1	NR_046262	chr5:36876796	-	TSS	TSS	NNNNNNNNNNNNNNNNNNNNNNNNNNNNNNACTCCACTTCCGCCACCGCCGCAGCCGCCG	FALSE	FALSE	FALSE	FALSE	FALSE	0	25	28.57	6.845
NR_110099:9	9	NR_110099	chr15:83419324	+	none	TSS	NNNNNNNNNNNNNNNNNNNNNNGTGGATTTACTAGGAAGGTGGGACGTTGGAGGGGTGGC	FALSE	FALSE	FALSE	FALSE	FALSE	112	25	12.57	1.35
NM_004708:3	3	NM_004708	chr19:33072096	+	none	TSS	NNNNNNNNNNNNNNNNNNNNNNNNNNNNGCAGTGGTCAAGGCCGCGCTCGCGCCGAGGGG	FALSE	FALSE	FALSE	FALSE	FALSE	2152	23.105	20.125	5.5
NM_002525:188	188	NM_002525	chr1:52344422	-	none	TSS	GCGGAGGGACGAGGGAAGTCGGCGAGAGGGAGACTGGGTTGGGGGAGGGGTTCAGGCCTG	FALSE	FALSE	TRUE	FALSE	FALSE	83	22.915	13.855	2.38
NM_001032296:45	45	NM_001032296	chr13:99229361	-	none	TSS	GCTCGCGGGCTCGGCGGGCTGTGCGCGCCCACTCCGGCTCCAGCGGCCAGCGCGCGCGGG	FALSE	FALSE	FALSE	FALSE	FALSE	5	22.22	20.325	3.835
NM_002268:18	18	NM_002268	chr3:160283359	-	none	TSS	NNNNNNNNNNNNNGCAGCGCCGGGGCCCTCAGATCGAGGCTGCCTCCCCCTCTCAGCCGG	FALSE	FALSE	FALSE	FALSE	FALSE	39	21.11	18.69	3.295
NM_024100:1	1	NM_024100	chr19:984328	+	TSS	TSS	NNNNNNNNNNNNNNNNNNNNNNNNNNNNNNACGTCCGGGGCGGTGGGGAAGGCAAGATGG	FALSE	FALSE	FALSE	FALSE	FALSE	6	20.83	25.765	3.69
NR_024549:93	93	NR_024549	chr7:86781769	+	none	TSS	TCCGTTTCCGGTGGCTCGTCGCGCTCGCTCACTCCAGCTGCAGCCACTCTCGCCCGTGGC	FALSE	FALSE	FALSE	FALSE	FALSE	118	20.83	17.21	1.515
NM_001080510:10	10	NM_001080510	chr17:74722921	+	none	TSS	NNNNNNNNNNNNNNNNNNNNNGTGCCCATCACTTCCGGTCGCGCCAGCCGCCCGTTGCCA	FALSE	FALSE	FALSE	FALSE	FALSE	4	20.535	21.255	5.845
NM_175902:52	52	NM_175902	chr17:80376462	-	none	TSS	AGCCCAGGGGCCGATGGCCGAGCGCGTCGCACTCGCGTCCCTGCGCCGTGCCTGCCTCGC	FALSE	FALSE	TRUE	FALSE	FALSE	1	20	23.425	6.015
NM_006510:7	7	NM_006510	chr6:28891762	-	none	TSS	NNNNNNNNNNNNNNNNNNNNNNNNGGGTTTACGCTGCCGCCGGCATCCGCTCGGACGCGG	FALSE	FALSE	FALSE	FALSE	FALSE	34	19.06	17.815	1.965
NM_025069:4	4	NM_025069	chr8:37553272	+	none	TSS	NNNNNNNNNNNNNNNNNNNNNNNNNNNGCTATTTGACGTGCGGCTCGAGGAAGGCGAAGG	FALSE	FALSE	FALSE	FALSE	FALSE	0	18.75	25.23	4.66
NR_046432:25	25	NR_046432	chr12:2986389	+	none	TSS	NNNNNNAATCGGCGCCGGCCTTGTCTCGGCATTCCGGGCTCGAAGGCTGTGCGGTCTGCC	FALSE	FALSE	FALSE	FALSE	FALSE	10	18.75	37.765	10.905
NM_001278172:6	6	NM_001278172	chr1:161284171	+	none	TSS	NNNNNNNNNNNNNNNNNNNNNNNNNGCGTCACTTCCGTCCAGACCGGAACCCAAGATGGC	FALSE	FALSE	FALSE	FALSE	FALSE	17	18.01	13.995	2.865
NM_153358:19	19	NM_153358	chr19:12721750	+	none	TSS	NNNNNNNNNNNNGCAAATGCGTGCTACGTCACTGTGCGATCGGGTTGTGCTTAGCTTGGG	FALSE	FALSE	FALSE	FALSE	FALSE	41	17.14	14.005	0
NR_033338:51	51	NR_033338	chr17:79519379	-	none	TSS	GGAGCCGCCGCCGCGCGGCCGGGGCTTCTCACTCTGACGGGCCCGCGCGCACGATGGCCG	FALSE	FALSE	FALSE	FALSE	FALSE	0	16.9	16.57	3.09
NM_001002756:194	194	NM_001002756	chr2:69664567	-	none	TSS	TTCGTGGTTCTGTCAGGGAGACCCTTAGGCACTCCGGACTAAGATGGCGGCGACGGCCAG	FALSE	FALSE	FALSE	FALSE	FALSE	105	16.665	15.285	3.41
NM_001077352:39	39	NM_001077352	chr14:23388358	-	none	TSS	CGCAGATTGGGGAAGGTTCTGGAAGACGGCAGAGCTGCCGCCATTTTGCGGGAAGAGGAG	FALSE	FALSE	FALSE	FALSE	FALSE	2427	16.665	14.525	0
NM_001145299:32	32	NM_001145299	chr17:74099837	-	none	TSS	GGACCAAGAGCGGAAGTGGGTGTGACGGGGACGGGGGCCCGGTGGGCCCGCGGAGGAAAG	FALSE	FALSE	FALSE	FALSE	FALSE	23	16.665	16.185	0
NM_003255:4	4	NM_003255	chr17:76921469	-	none	TSS	NNNNNNNNNNNNNNNNNNNNNNNNNNNCGCAGCAAACACATCCGTAGAAGGCAGCGCGGC	FALSE	FALSE	FALSE	FALSE	FALSE	616	16.665	18.945	4.905
NM_032299:10	10	NM_032299	chr11:102962935	-	none	TSS	NNNNNNNNNNNNNNNNNNNNNGATTGCGTCACTTCCGGGCCTCAGCGATTCGCCTCCGGG	FALSE	FALSE	FALSE	FALSE	FALSE	4	16.665	30.785	7.495
NM_032509:16	16	NM_032509	chr8:33342700	+	none	TSS	NNNNNNNNNNNNNNNCGCGATCCGACCGGAAGTTGCACGCTGAGCCGCGGACACCATGCA	FALSE	FALSE	FALSE	FALSE	FALSE	191	16.665	18.16	1.28
NM_001198836:49	49	NM_001198836	chr11:66384101	+	none	TSS	CCTGCGCGGCGGGGTTCTCGGTCGCCAGCCATTCCTGAGGAGGACTGCCGGTCGTTCGGA	FALSE	FALSE	FALSE	FALSE	FALSE	33	16.11	18.545	4.125
NM_002453:18	18	NM_002453	chr2:55496367	-	none	TSS	NNNNNNNNNNNNNGGACTGACCTACCGACCATTCTTCCGGGTCCAGAAGGTGATCTCCGC	FALSE	FALSE	FALSE	FALSE	FALSE	1	15.625	18.3	4.83
NM_001003897:8	8	NM_001003897	chr20:35918058	+	none	TSS	NNNNNNNNNNNNNNNNNNNNNNNGGGAACTACTTCCGGGGGAGCGGCGCGGCGGCGCGGG	FALSE	FALSE	FALSE	FALSE	FALSE	47	15	18.095	4.975
NM_032050:90	90	NM_032050	chr22:31742160	-	none	TSS	CCCTCCAGGCTCCGGGACCCGGCCCGCGCCACCGCCCCCGTGCGCGCCCCGCCGCCGCCG	FALSE	FALSE	FALSE	FALSE	FALSE	0	15	17.06	4.94
NR_026052:54	54	NR_026052	chr19:59086819	+	none	TSS	AGCCTCCTCCCTGCCCGGCCGTCGCCAGGCAACCTTCCCCCTTCGCGGCCGAGATGGACC	FALSE	FALSE	FALSE	FALSE	FALSE	24	15	17.865	2.03
NM_001271971:140	140	NM_001271971	chr6:44214834	+	none	TSS	CCTTATATAGGGCGACTTGGGGCACGCAGTAGCTCTCTCGAGTCACTCCGGCGCAGTGTT	FALSE	FALSE	FALSE	FALSE	FALSE	3160	14.435	18.62	3.345
NM_001282673:4	4	NM_001282673	chr1:2126211	-	none	TSS	NNNNNNNNNNNNNNNNNNNNNNNNNNNCTCACTTCCGCCCGGCGCGGGCTTGGATGGAGG	FALSE	FALSE	FALSE	FALSE	FALSE	1	14.285	15.04	2.94
NM_004387:107	107	NM_004387	chr5:172662209	-	none	TSS	CTTGTGCTCAGCGCTACCTGCTGCCCGGACACATCCAGAGCTGGCCGACGGGTGCGCGGG	FALSE	FALSE	FALSE	FALSE	FALSE	1	14.285	13.355	2.63
NM_012322:27	27	NM_012322	chr7:32529997	-	none	TSS	NNNNAAAGTCGTCCCACCATCAATGAAGGCAGGCCACTTCCGGCGTAGCCATGGCGGCTA	FALSE	FALSE	FALSE	FALSE	FALSE	107	14.13	15.725	3.265
NM_001300947:36	36	NM_001300947	chr12:69633352	+	none	TSS	AAGTGACGCAAGCGCCCCCCCACCGCCGCTAGATCCGCTGCTGCTGCCGCGGCGGGCAGA	FALSE	FALSE	FALSE	FALSE	FALSE	2	13.94	16.85	2.16
NM_001398:51	51	NM_001398	chr19:39322447	-	none	TSS	GTGCCCGCCCCCTCCGCTAACGGGCACGTTACTCCGTCCGAACGCAGTAGACGAAGGCGG	FALSE	FALSE	FALSE	FALSE	FALSE	16	13.885	15.61	2.985
NM_002999:1	1	NM_002999	chr20:43977064	-	TSS	TSS	NNNNNNNNNNNNNNNNNNNNNNNNNNNNNNACTCGCCGCAGCCTGCGCGCCTTCTCCAGT	FALSE	FALSE	FALSE	FALSE	FALSE	14	13.39	20.955	2.285
NM_006713:59	59	NM_006713	chr5:32585663	+	none	TSS	CGGCGGGGCCGGCGTCTCCTGGCTGCCGTCACTTCCGGTTCTCTGTCAGTCGCGAGCGAA	FALSE	FALSE	FALSE	FALSE	FALSE	197	13.325	15.73	3.55
NM_005348:132	132	NM_005348	chr14:102553381	-	none	TSS	TATATAAGGCAGGCGCGGGGGTGGCGCGTCAGTTGCTTCAGCGTCCCGGTGTGGCTGTGC	FALSE	FALSE	FALSE	FALSE	FALSE	66756	12.855	15.23	2.975
NM_002092:21	21	NM_002092	chr4:71705607	-	none	TSS	NNNNNNNNNNCCCAACCGGCCCTGGATTCCACTTCCGTTCCACCATCGCTGCTGGAGCAG	FALSE	FALSE	TRUE	FALSE	FALSE	31	12.82	15.695	3.61
NM_019613:92	92	NM_019613	chr17:80606320	-	none	TSS	ACATCCAGCACGCACGCACGTACGTCCGGCACTTCCGGCCGCGGCGGCCTCAGCGCCGGC	FALSE	FALSE	FALSE	FALSE	FALSE	16	12.7	18.005	4.31
NM_001098511:45	45	NM_001098511	chr5:61602033	+	none	TSS	GGCTCCCCGGCGGGCGGTGCGGGCCCTCCCACTCTACCCCGCGCCGTCTCACGGCCCCGG	FALSE	FALSE	FALSE	FALSE	FALSE	4	12.695	19.68	1.385
NM_203504:72	72	NM_203504	chr4:76598596	-	none	TSS	ATAAGAGGGGGCGGTGGCAAAGGGGGCGGGACGTCCGTGGTCCTTGTCGCACGTCGCAGC	FALSE	FALSE	FALSE	FALSE	FALSE	240	12.69	19.98	5.355
NM_019051:24	24	NM_019051	chr9:104160896	-	none	TSS	NNNNNNNACTGCTGGCTGAAGGCTGCGCTCAGGCCCGTGGATCTCATCGAAGATGGCGGC	FALSE	FALSE	FALSE	FALSE	FALSE	0	12.665	17.15	2.75
NM_001098517:109	109	NM_001098517	chr11:115375133	-	none	TSS	GCTCGGGCTCCGGAGGCAGCCAACGCCGCCAGTCTGAGGCAGGTGCCCGACATGGCGAGT	FALSE	FALSE	FALSE	FALSE	FALSE	104	12.5	19.675	4.63
NM_001193417:1	1	NM_001193417	chrX:41193415	+	TSS	TSS	NNNNNNNNNNNNNNNNNNNNNNNNNNNNNNAGAGCCGCAGTTCTCCCGTGAGAGGGCCTT	FALSE	FALSE	FALSE	FALSE	FALSE	11327	12.5	18.75	3.39
NM_001276289:38	38	NM_001276289	chr17:66508557	+	none	TSS	TCAGTAGCCGAACGCTGATTGGCTGCGGCCAGGCCGTTTCCGGTGGAGCTGTCGCCTAGC	FALSE	FALSE	FALSE	FALSE	FALSE	458	12.5	14.92	0
NM_001278740:1	1	NM_001278740	chrX:99891729	-	TSS	TSS	NNNNNNNNNNNNNNNNNNNNNNNNNNNNNNAATCGCCCGGTGCGGTGGTGCAGGGTCTCG	FALSE	FALSE	FALSE	FALSE	FALSE	129	12.5	22.05	2.855
NM_001303100:58	58	NM_001303100	chr8:681182	-	none	TSS	GCTCAGCTCAGGACCGCGCGCCGTGGTCTGAGGTCCGCGGCAGGGTCCCGCATGGCGGCG	FALSE	FALSE	FALSE	FALSE	FALSE	12	12.5	18.605	5.045
NM_001304509:24	24	NM_001304509	chr9:116139266	-	none	TSS	NNNNNNNGCCCCACCGCCCGGCGCTTGCGCACCTCCGCCCGAGCTCGCGGGCCTTGCGGC	FALSE	FALSE	FALSE	FALSE	FALSE	17	12.5	27.52	4.19
NM_004595:130	130	NM_004595	chrX:21958820	+	none	TSS	CGCCCCGGGTCGCTCCCGGCGGCCCCTCCCACCTCCTAGTCCTGGCCTCCCCGGGCGCAG	FALSE	FALSE	FALSE	FALSE	FALSE	27	12.5	16.595	0
NM_012421:9	9	NM_012421	chr1:40627049	+	none	TSS	NNNNNNNNNNNNNNNNNNNNNNGGTTGCCTACGCGCTGGTGGGCCGTGGGAAGATGGCGG	FALSE	FALSE	FALSE	FALSE	FALSE	9	12.5	23.155	2
NM_014038:48	48	NM_014038	chr7:16685806	+	none	TSS	CGTGTGTCTATGTCAATGTGTCTGTCCTTCACTCCTCCATTGTCTGCCGCCACTGCTGCT	FALSE	FALSE	FALSE	FALSE	FALSE	46	12.5	14.885	2.645
NM_032345:20	20	NM_032345	chr12:56321678	-	none	TSS	NNNNNNNNNNNGGGCCCAGCCCGAGGAGGCACTCAGGGTTAGGAGGTCTGGGCGAGAAGC	FALSE	FALSE	FALSE	FALSE	FALSE	4	12.5	17.115	2.005
NM_182958:4	4	NM_182958	chr16:31128988	+	none	TSS	NNNNNNNNNNNNNNNNNNNNNNNNNNNGTCACTTCCCTTCCCGCGATGGCGGCACAGGGA	FALSE	FALSE	FALSE	FALSE	FALSE	5	12.5	24.455	4.46
NM_003217:48	48	NM_003217	chr12:50135340	+	none	TSS	TAAAAGATCGGGAGCGGAAGTGGGCGAGTCAGAGCACATCCGGTGTTAGAAGCGCTGGTA	FALSE	FALSE	FALSE	FALSE	FALSE	7245	12.265	15.45	3.22
NM_001008528:41	41	NM_001008528	chr17:74707047	-	none	TSS	CGGGCTCCCTCGGGGTCCCAGCTGGCCCGCACTCGGCGGCCGCGGCGCGATGGAGGCGCC	FALSE	FALSE	FALSE	FALSE	FALSE	3	12.15	17.675	4.975
NM_003676:33	33	NM_003676	chr1:224370942	+	none	TSS	CTCCTCCGCGCTCCGCCACAGCCGGCCGACACCACACCAGCCGGGGAGCCGCCGCCGCCG	FALSE	FALSE	FALSE	FALSE	FALSE	45	12.14	18.97	4.3
NM_178326:82	82	NM_178326	chr2:242577108	+	none	TSS	CTGGCCCGTCGGAGCGACGCCGCTCGGGTCAGTCGGCGGCCGGACTGGGAAGATGGACGC	FALSE	FALSE	FALSE	FALSE	FALSE	58	12.055	20.835	5.45
NM_001001410:1	1	NM_001001410	chr16:1401873	-	TSS	TSS	NNNNNNNNNNNNNNNNNNNNNNNNNNNNNNACAGCCCATTGGGAGGCCGAGGGGCGCGGC	FALSE	FALSE	FALSE	FALSE	FALSE	3	11.9	17.775	2.085
NM_000611:57	57	NM_000611	chr11:33757969	-	none	TSS	CTGGAGCGAAAGAATGCGGGGGCTGAGCGCAGAAGCGGCTCGAGGCTGGAAGAGGATCTT	FALSE	FALSE	FALSE	FALSE	FALSE	776	11.725	18.635	5.785
NM_153334:35	35	NM_153334	chr22:20792112	-	none	TSS	CCCCTCCTGCCGCCCCCCGCCCGGCCTCGCACTCCGCTTCCGGCCGCTCTCGCTGCGGCC	FALSE	FALSE	FALSE	FALSE	FALSE	0	11.535	21.52	3.19
NM_016118:52	52	NM_016118	chr7:151038898	+	none	TSS	AACAAACGGCGGCCGCTGCCGCATCCGGGCACTCTGCTGGTCGCGGCGGGAGTGGCGTGG	FALSE	FALSE	FALSE	FALSE	FALSE	5	11.33	13.375	1.63
NM_001286433:8	8	NM_001286433	chr16:447199	+	none	TSS	NNNNNNNNNNNNNNNNNNNNNNNCGCGCTCACAGCGGCCCGCGGGCCGGGCGTCATGGGC	FALSE	FALSE	FALSE	FALSE	FALSE	205	10.415	15.95	1.695
NM_004373:24	24	NM_004373	chr12:120875916	+	none	TSS	NNNNNNNACTTCCGCTTCCGGCGCTGCGGCAGTCCAGATCAAAAATGGCGGTAGTTGGTG	FALSE	FALSE	FALSE	FALSE	FALSE	3751	10.405	14.86	3.705
NM_006306:75	75	NM_006306	chrX:53449603	-	none	TSS	CACTGCGGCGTTTCCCGCGCGGGCTACCTCAGTTCTCGGGCGTACGGCGCGGCCTGTCCT	FALSE	FALSE	FALSE	FALSE	FALSE	39	10.33	14.56	2.91
NM_001009186:81	81	NM_001009186	chr7:56119458	+	none	TSS	TGGGGGCCGGCCAGACGGGCCGACTTTTCCAGAAGACCCGGATAGTTCCTCCCGGCCACG	FALSE	FALSE	FALSE	FALSE	FALSE	831	10.315	14.11	1.645
NM_001242758:63	63	NM_001242758	chr6:29910309	+	none	TSS	TCTAAAGCCCGCACGCACCCACCGGGACTCAGATTCTCCCCAGACGCCGAGGATGGCCGT	FALSE	FALSE	FALSE	FALSE	FALSE	1	10.26	16.17	1.92
NM_012170:78	78	NM_012170	chr15:76196277	+	none	TSS	TGGCGTAATCGGGTTCCTCCGAGCCGCCGTAGGACTGGTTCCGGCGGGCTGGTGAGGAAT	FALSE	FALSE	FALSE	FALSE	FALSE	158	10.235	14.17	1.635
NM_001197320:129	129	NM_001197320	chr1:150552086	-	none	TSS	CCTAAAACCGTGATAAAGGAGCTGCTCGCCACTTCTCACTTCCGCTTCCTTCCAGTAAGG	FALSE	FALSE	FALSE	FALSE	FALSE	186	10.095	19.485	1.02
NM_001160408:25	25	NM_001160408	chr12:3000057	+	none	TSS	NNNNNNACGCGGCGGCGTGCCAGCCTAGCCACTCTAGCGACGGCGGGGAAGAGTGTGTAC	FALSE	FALSE	FALSE	FALSE	FALSE	25	10	19.11	2.775
NM_001281299:25	25	NM_001281299	chr9:139760764	-	none	TSS	NNNNNNGAGGGGACGTAGCGTCGCCGCGCCAGGTCTCTAGCAGCTGCCGCTGAGCCGCCG	FALSE	FALSE	FALSE	FALSE	FALSE	997	10	26.18	6.58
NM_001300905:6	6	NM_001300905	chr12:57024110	-	none	TSS	NNNNNNNNNNNNNNNNNNNNNNNNNGACTCACTCCTCCCCCGCCGGCCATGTTGGCTCCT	FALSE	FALSE	FALSE	FALSE	FALSE	54	10	19.75	5.16
NM_001678:113	113	NM_001678	chr17:7554320	+	none	TSS	GGCTGTCCCCCAGCTGCGCGTCCCCGCCCCACCCCCGCGGCTGAGCCACCACCGGTGCAG	FALSE	FALSE	FALSE	FALSE	FALSE	0	10	50.5	3.57
NM_003234:1	1	NM_003234	chr3:195808961	-	TSS	TSS	NNNNNNNNNNNNNNNNNNNNNNNNNNNNNNAGAGCGTCGGGATATCGGGTGGCGGCTCGG	FALSE	FALSE	FALSE	FALSE	FALSE	2049	10	16.405	4.505
NM_018464:23	23	NM_018464	chr10:60028884	+	none	TSS	NNNNNNNNAGCACCTACCAGGGTCGAGCTCACACACGTGCCTACGACCCGCCGCGGCGCC	FALSE	FALSE	FALSE	FALSE	FALSE	6	10	15.41	1.56
NR_072994:65	65	NR_072994	chr6:30585020	-	none	TSS	TAAAAGACTCCACCCGAGCGGGCGGCCGCCATTCTGGGGTTCGTTTAGAGGTTTGAATTT	FALSE	FALSE	FALSE	FALSE	FALSE	7	10	26.23	5.89
NM_032881:54	54	NM_032881	chr1:36863507	-	none	TSS	GTGACGCGGTGACTTGCAGAGCACTGACGCACTCTGCGCCCGGAGGACAGAGCGGCCCGG	FALSE	FALSE	FALSE	FALSE	FALSE	1	9.915	20.155	5.65
NM_024948:14	14	NM_024948	chr10:15902519	-	none	TSS	NNNNNNNNNNNNNNNNNAAAGAGGAGTCGGAAGTGGCACCAGCACTTCCGGTACGGAAAA	FALSE	FALSE	FALSE	FALSE	FALSE	3	9.58	17.14	0
NM_148416:119	119	NM_148416	chr16:28834487	+	none	TSS	CGCCCGCCCACGGCGGGCCCCGGCTGCCCGATCCCCCTCGCTTCCCGCGCTCTCCAGCGG	FALSE	FALSE	FALSE	FALSE	FALSE	0	9.165	16.195	0
NM_002690:37	37	NM_002690	chr8:42196009	+	none	TSS	CGCCGTGCGCCCCGCCCCCCATCGGGGGCAACCATTGTTCCGCCGGTCGCGCCGGAGCTG	FALSE	FALSE	FALSE	FALSE	FALSE	58	8.39	11.935	0
NR_031592:4	4	NR_031592	chr19:10514211	-	none	TSS	NNNNNNNNNNNNNNNNNNNNNNNNNNNTCCACTGCTGCCGCCGTCGCCGCCACCCGAGCC	FALSE	FALSE	FALSE	FALSE	FALSE	7	8.385	16.64	2.25
NM_001185093:13	13	NM_001185093	chr1:161087919	+	none	TSS	NNNNNNNNNNNNNNNNNNGCTTCTGGCTCCAGACCGCCCTCCGGATCGGACCCTGCGAAT	FALSE	TRUE	FALSE	FALSE	FALSE	67	8.33	13.755	1.72
NM_002731:105	105	NM_002731	chr1:84543762	+	none	TSS	GCGAAGGGGGAGTGTCTGCCCGCCGCCGCCACTGCTGCTGCCACCGCCGTCGCCGCCGCC	FALSE	FALSE	TRUE	FALSE	FALSE	0	8.33	14.325	0
NM_005482:18	18	NM_005482	chr1:77685115	-	none	TSS	NNNNNNNNNNNNNACTGCCTCCGCCCCTTCAGGTGCGGGAAGTCTGAAGCCGGTAAACAT	FALSE	FALSE	FALSE	FALSE	FALSE	73	8.33	14.39	3.59
NM_014604:102	102	NM_014604	chr17:3571872	-	none	TSS	TTGTTAAGCAGCGAGGGCGCGACCGCGGGTACTCTGCTGCCGGCTTCTCGGAGCGGCGCT	FALSE	FALSE	FALSE	FALSE	FALSE	41	8.295	14.465	2.27
NM_001172:59	59	NM_001172	chr14:68086637	+	none	TSS	AGGTAAGAGCAGCGGCGGGCGGTGGCGCTCACTCCCGGCTTCCAACCGCGCGGAGCCTCT	FALSE	FALSE	FALSE	FALSE	FALSE	6	8.125	16.845	2.525
NM_001130528:125	125	NM_001130528	chr17:49198102	-	none	TSS	GGCCCGGGCTCCAGCCCTAGTACCCGTCCCAGCCCGAGTCGGGTCCGTCCCGTGCGGGCA	FALSE	FALSE	FALSE	FALSE	FALSE	0	7.89	14.395	0
NM_003365:2	2	NM_003365	chr3:48647097	-	none	TSS	NNNNNNNNNNNNNNNNNNNNNNNNNNNNNCAGTCTACGCTTGCGCGGCGCAACAGGGCCG	FALSE	FALSE	FALSE	FALSE	FALSE	50	7.495	22.005	3.865
NM_005637:35	35	NM_005637	chr18:23670577	-	none	TSS	GGCCGGCGTCTCTCCCCCAGTTTGCCGTTCACCCGGAGCGCTCGGGACTTGCCGATAGTG	FALSE	FALSE	FALSE	FALSE	FALSE	191	7.14	16.32	2
NM_006353:7	7	NM_006353	chr6:26538578	+	none	TSS	NNNNNNNNNNNNNNNNNNNNNNNNATCCTCACCTTCCCTCGCCTTCCTGTTCCTGGCGGA	FALSE	FALSE	FALSE	FALSE	FALSE	5	7.14	16.085	0
NM_016077:169	169	NM_016077	chr17:57784791	-	none	TSS	AGGAACCCCGGAAGAGGTAGCTCACGCGATAGAAACGTGTTCGCTGCCCAGAAGAAGGGA	FALSE	FALSE	FALSE	FALSE	FALSE	1599	7.14	12.735	2.01
NM_080652:23	23	NM_080652	chr3:185216823	-	none	TSS	NNNNNNNNAGTGAACGTGCTCCGCGGGCTCAGTCCGCCCGCCGCTGCGTCCCGGAGTGCA	FALSE	FALSE	TRUE	FALSE	FALSE	8	7.14	16.28	4.105
NR_030684:4	4	NR_030684	chr17:7835264	-	none	TSS	NNNNNNNNNNNNNNNNNNNNNNNNNNNAGCAGTTCCGGTGAGTCCGTGGGTGGGGTCCCC	FALSE	FALSE	FALSE	FALSE	FALSE	50	6.825	14.53	4.1
NM_016304:93	93	NM_016304	chr15:55489139	-	none	TSS	GAAGGTAACTTCCGGTGACGGGGTTGCATCACTTCCTCTCAAGCTTGGCGTTTGTTTGGT	FALSE	FALSE	FALSE	FALSE	FALSE	837	6.545	12.005	0.51
NM_001144831:74	74	NM_001144831	chr12:7079843	-	none	TSS	GGCTAAGGGGGAGGGTTTCAAAGGGAGCGCACTTCCGCTGCCCTTTCTTTCGCCAGCCTT	FALSE	FALSE	TRUE	FALSE	FALSE	28	6.45	18.185	4.695
NM_018092:81	81	NM_018092	chr16:47177856	-	none	TSS	TTAAATGAGCCTGGGCGCCCCGCGCCCGCCACTTCAGTGGATCCCGCGCCGGGGCCGCGG	FALSE	FALSE	FALSE	FALSE	FALSE	13	6.25	18.34	3.73
NM_015190:77	77	NM_015190	chr10:75007013	-	none	TSS	CCCTGGGCTTTTTGGGCGCGAAAAAGAAGCAGTCCTGGGTTGTACCCGGCGCAGCTGGGA	FALSE	FALSE	FALSE	FALSE	FALSE	227	6.185	12.285	1.18
NM_152856:51	51	NM_152856	chrX:47004667	+	none	TSS	CGGAGCGCCGACTCCCTTCTCGTCGTCGCCATTTTGAGCTGGTGACTGTGGCCGGCTGGG	FALSE	FALSE	FALSE	FALSE	FALSE	0	5.555	19.45	4.695
NM_024551:80	80	NM_024551	chr12:1800326	+	none	TSS	CTCCGTTCCCCCCTCCTCCCCCCTCCCCTCAGCGGTGGCTCCCAAGAAGTCCGAGACACG	FALSE	FALSE	TRUE	FALSE	FALSE	0	5	29.025	7.935
NM_006445:16	16	NM_006445	chr17:1588161	-	none	TSS	NNNNNNNNNNNNNNNGAACTCGGGTTGCGCACTTCCCGGCGCTGGGAACGCGGAGCGGAC	FALSE	FALSE	FALSE	FALSE	FALSE	6	4.955	14.72	3.855
NM_001134335:55	55	NM_001134335	chr7:6098806	-	none	TSS	GGAGGCTGGTTTTCCGTCTGGTGAGGGGTTACTTCCGGGTCGGACGGCGCTAGCTGCAGC	FALSE	FALSE	FALSE	FALSE	FALSE	42	4.545	17.195	3.15
NM_001144995:184	184	NM_001144995	chr14:100070544	-	none	TSS	GGCCGGGGGCGGGCCTCCGCCTGCTTCTCCAGAACCCTGAGAGCGCCCGGCACCGCGGCC	FALSE	FALSE	FALSE	FALSE	FALSE	7	4.545	14.67	1.76
NM_025065:23	23	NM_025065	chr1:84944942	+	none	TSS	NNNNNNNNAGAAGGCTATTTCCGTTTCCGTACGGAAGCAAAGGAGCCAAGACCATGGCGA	FALSE	FALSE	FALSE	FALSE	FALSE	214	4.545	14.145	1.315
NM_176793:19	19	NM_176793	chr10:102747254	-	none	TSS	NNNNNNNNNNNNCCGGAAGCCTCGAGGTTTAGTCCCGCCCCCCTCTCCTCGCTGCTTAGG	FALSE	FALSE	FALSE	FALSE	FALSE	41	4.545	15.145	3.15
NM_014305:124	124	NM_014305	chr13:95248406	-	none	TSS	TTTCAGACCATACTCTTTACGGTACTAGGCACTGCTGAGCTGGGAGATGTCGGCGGCGTG	FALSE	FALSE	FALSE	FALSE	FALSE	5	4.165	13.435	2.515
NM_018947:98	98	NM_018947	chr7:25164883	-	none	TSS	GTACTTAAGCGCGGACCGGCGTGTCCTTGGACTTAGAGAGTGGGGACGTCCGGCTTCGGA	FALSE	FALSE	FALSE	FALSE	FALSE	14	4.165	14.29	4.21
NM_019070:41	41	NM_019070	chr19:19030524	+	none	TSS	GCCGGAAGCGCGGATCACACGGGCCCCTACAAGGGGCCCCTACAAGCGGCCACAAGGATG	FALSE	FALSE	TRUE	FALSE	FALSE	384	4.165	14.12	0
NM_018126:18	18	NM_018126	chr4:41937154	+	none	TSS	NNNNNNNNNNNNNACGGAAATGAAAGGAGCACTTCCGGGTTCGGCAATAACCTGGAGCCG	FALSE	FALSE	FALSE	FALSE	FALSE	20	3.845	24.285	1.85
NM_032014:26	26	NM_032014	chr7:43909120	-	none	TSS	NNNNNTCCCCACCCCTCAGCGCGCTGTGGTACGTCCCGCGCTCCGCTTGGCCCAAGATGG	FALSE	FALSE	FALSE	FALSE	FALSE	12	3.845	23.97	6.295
NM_015324:38	38	NM_015324	chr11:6624843	-	none	TSS	CGCCGGCCGCTCTAGCAACCCCTGGCTGTCACGCTTTGGTTTCCGGGTCGGTTCTGGCAG	FALSE	FALSE	FALSE	FALSE	FALSE	60	3.33	14.195	2.105
NM_003470:84	84	NM_003470	chr16:9057258	-	none	TSS	CCGCCGTCGCCGACGACGCGCGGGAGGAGGAGGAGGAGGCCGCCCCGCCGCCGCCGCCGC	FALSE	FALSE	FALSE	FALSE	FALSE	0	2.94	13.895	2.48
NM_001012456:14	14	NM_001012456	chr7:54826926	-	none	TSS	NNNNNNNNNNNNNNNNNGGCAGAAACCCGGATTCCGGTTCCGGTGGGCCTCCATCAGCAA	FALSE	FALSE	FALSE	FALSE	FALSE	2	2.145	17.065	4.2
NM_001252377:144	144	NM_001252377	chr17:73127747	-	none	TSS	TGGACATGGACGGCGTCCTGGCCGACTTCGAGGCCGGCCTCCTGCGGGGCTTCCGCCGCC	FALSE	FALSE	FALSE	TRUE	FALSE	0	0.845	18.585	1.02
NR_001568:83	83	NR_001568	chrX:70948880	-	TRMT6/61	TSS	GCGGGAGGATAGCTTGAGCCCAGGAGTTCGAGACCTGCCTGGGCAATATAGCGAGACCCC	TRUE	TRUE	FALSE	TRUE	FALSE	0	0.705	39.515	0.935
NM_001039465:83	83	NM_001039465	chr14:70233911	+	none	TSS	CGAGTTAAGTCCTGGTCTGCGTGGAGGTCGACGACTCCGTCGCAGACTACGGACCTGTCT	FALSE	TRUE	FALSE	TRUE	FALSE	1	0.675	20.175	0.705
NM_007104:174	174	NM_007104	chr6:35436783	+	none	TSS	GCTTGAAGAACTATGATCCCCAGAAGGACAAGCGCTTCTCGGGCACCGTCAGGCTTAAGT	FALSE	FALSE	FALSE	TRUE	FALSE	0	0.485	14.165	1.245
NM_001024674:4	4	NM_001024674	chr14:74551659	+	none	TSS	NNNNNNNNNNNNNNNNNNNNNNNNNNNGTCACGTGACATGGGTTGGAAGATGGCGTCTCC	FALSE	FALSE	FALSE	FALSE	FALSE	44	0	22.83	3.26
NM_001043351:32	32	NM_001043351	chr1:154155694	-	none	TSS	TCACATCCGGGCGGGTTGGTGAGTTCCGGTATTTCAGGGCGTAGCAGGCGGAAGTAAGGG	FALSE	FALSE	FALSE	FALSE	FALSE	0	0	36.05	10.045
NM_001078172:2	2	NM_001078172	chrX:134186220	-	none	TSS	NNNNNNNNNNNNNNNNNNNNNNNNNNNNNCACCCTCGACATGCGCTTCCGGCGACGCCTT	FALSE	FALSE	FALSE	FALSE	FALSE	1	0	16.675	1.785
NM_001081491:51	51	NM_001081491	chr11:62572914	-	none	TSS	TGTATAAATGCGGTGGCGCCCGGCGTAGGGACACTTCGGTCCTGAGCGCTTGGGAGTTAG	FALSE	FALSE	FALSE	FALSE	FALSE	20	0	19.095	3.405
NM_001082968:74	74	NM_001082968	chr17:17875711	-	none	TSS	GTTCCAGAGAGTGGGGAGGGGGCAAGTGTCAGTCAGGACGGGAGTCCGGCGGGTTACAGC	FALSE	FALSE	FALSE	FALSE	FALSE	49	0	14.63	1.315
NM_001083590:67	67	NM_001083590	chr2:27255840	+	none	TSS	ACGTGGCAGAGTGCGGCGCGCTCGCGCCGGACCGGAAAGCCGGGGAAGTGGCCGAGGAGG	FALSE	FALSE	FALSE	FALSE	FALSE	17	0	13.885	0
NM_001100819:5	5	NM_001100819	chr2:198380771	+	none	TSS	NNNNNNNNNNNNNNNNNNNNNNNNNNCCCTACATCCGGGTACCGACTCCAGCCGCCTAGA	FALSE	FALSE	FALSE	FALSE	FALSE	46	0	19.2	1.665
NM_001127:19	19	NM_001127	chr22:29784554	-	none	TSS	NNNNNNNNNNNNCCCGCGCGCGGGCAGCTCACTTCCGCCCGGCAGGTGACAGCCGCGGGG	FALSE	FALSE	FALSE	FALSE	FALSE	1	0	16.065	3.575
NM_001137673:26	26	NM_001137673	chr19:10764962	+	none	TSS	NNNNNAAAGGGGGCGGGGCTTCAGCCGGTCACGTGTTCCCGCACCTCCCCGGCGCGCGCC	FALSE	FALSE	FALSE	FALSE	FALSE	22	0	14.245	1.15
NM_001143835:18	18	NM_001143835	chr11:129765473	-	none	TSS	NNNNNNNNNNNNNAGAGCGTGCGCGCACCCAGACTCCTTGCGGGAGCGAGTGCGTCTGGG	FALSE	FALSE	FALSE	FALSE	FALSE	28	0	17.735	1.74
NM_001164619:53	53	NM_001164619	chrX:133119621	-	none	TSS	CCAAGCGGTTCCCGCCCTCGCCCAGCGCCCAGGTAGCTGCGAGGAAACTTTTGCAGCGGC	FALSE	FALSE	FALSE	FALSE	FALSE	0	0	21.12	3.64
NM_001193343:12	12	NM_001193343	chr6:43655538	-	none	TSS	NNNNNNNNNNNNNNNNNNNAAATGGACGAGAGGTCAGGGTAGGTTTTTGAAGATGGCGGC	FALSE	FALSE	FALSE	FALSE	FALSE	135	0	19.685	5.505
NM_001195001:191	191	NM_001195001	chr1:29563218	+	none	TSS	TCACCTTCCAGCTCTGCGCGCCGGAGACCGAGACTCCGGCAGCTGGCTGCACCTTCGAGG	FALSE	FALSE	TRUE	TRUE	FALSE	0	0	34.165	3.57
NM_001195156:18	18	NM_001195156	chr1:35450931	-	none	TSS	NNNNNNNNNNNNNGGGTTTTCGGCGGGGCCAACCCACGGTGGGGGGAGCGCGGCCATGGC	FALSE	FALSE	TRUE	FALSE	FALSE	0	0	19.52	1.365
NM_001199158:65	65	NM_001199158	chr17:47866045	+	none	TSS	AAAAAGCGCTTCAGCCCGCGGCGCCTGCGCAGAACGCTCCAGACGCTGAGAGGCAGGAGG	FALSE	FALSE	FALSE	FALSE	FALSE	163	0	19.345	1.56
NM_001199291:1	1	NM_001199291	chr5:118788192	+	TSS	TSS	NNNNNNNNNNNNNNNNNNNNNNNNNNNNNNATTCCCCGCCTCCTCCTGTCCCGCAGTCGG	FALSE	FALSE	FALSE	FALSE	FALSE	3	0	19.09	0
NM_001253816:8	8	NM_001253816	chr8:145582224	+	none	TSS	NNNNNNNNNNNNNNNNNNNNNNNGGGCGGGACTTCCGGTCGTGGGCCATGCCGGGGGCGG	FALSE	FALSE	FALSE	FALSE	FALSE	0	0	27.305	0
NM_001256183:1	1	NM_001256183	chr16:89556969	-	TSS	TSS	NNNNNNNNNNNNNNNNNNNNNNNNNNNNNNAGAGGCCGCCCTGAGACGGTGCGCGATGGA	FALSE	FALSE	FALSE	FALSE	FALSE	3	0	16.385	1.515
NM_001261403:110	110	NM_001261403	chr10:104155462	+	none	TSS	GGTATTTTCGGGACTTTCCTAAGCTGCTCTAACTTTCCTGCCCCTTCCCCGGCCAAGCCC	FALSE	TRUE	FALSE	FALSE	FALSE	7	0	15.62	2.775
NM_001267608:1	1	NM_001267608	chr1:155225274	-	TSS	TSS	NNNNNNNNNNNNNNNNNNNNNNNNNNNNNNATTCCCATCCCCCTTCTCTAGTCCCCGACC	FALSE	FALSE	FALSE	FALSE	FALSE	0	0	38.795	5.88
NM_001270379:28	28	NM_001270379	chr8:101571987	-	none	TSS	NNNCTGTCTGGCCCCTCCCCTCCGCCCGTCACCGCCTCCTTGAAGCTGCCGCTGTCGCTG	FALSE	FALSE	FALSE	FALSE	FALSE	182	0	19.1	0
NM_001270533:20	20	NM_001270533	chr6:160148551	+	none	TSS	NNNNNNNNNNNGGTTTCCTCCCTCAGCGCCATTTTGTGGCAGCGAGACCCACAAATAAAG	FALSE	FALSE	FALSE	FALSE	FALSE	0	0	26.65	2.94
NM_001270710:146	146	NM_001270710	chr6:30658761	-	none	TSS	TCCCGACCCCGCCCCTTTCCCCACCCCTCCATTTCTCGCCATGGCCCCTGCACTGCTCCT	FALSE	FALSE	FALSE	FALSE	FALSE	0	0	30.3	8.59
NM_001282753:193	193	NM_001282753	chr9:82186880	+	none	TSS	GCTAAATTTGGTCAAAGAAGTCACCTACACAGAGCGTGTTGTTAGAGCTGTGCTGAGCGG	FALSE	FALSE	FALSE	FALSE	FALSE	141	0	16.815	1.19
NM_001286077:23	23	NM_001286077	chr11:62446567	-	none	TSS	NNNNNNNNACGTGACCCAAACAGATCCGGCACTTCCGCTTCCCCTCGGCTTTCTTCTCGT	FALSE	FALSE	FALSE	FALSE	FALSE	13	0	16.965	2
NM_001287435:31	31	NM_001287435	chr19:33793440	-	none	TSS	TATAAAAGCTGGGCCGGCGCGGGCCGGGCCATTCGCGACCCGGAGGTGCGCGGGCGCGGG	FALSE	FALSE	FALSE	FALSE	FALSE	0	0	51.56	14.08
NM_001308068:98	98	NM_001308068	chr16:2962077	+	none	TSS	GTGGCGGCGGCGGCCTGGGTCGCGGGGTCGACGCTCGCTGCTGCAGCGGCAGAGGCTGAA	FALSE	TRUE	FALSE	TRUE	FALSE	0	0	24.705	0
NM_002037:1	1	NM_002037	chr6:112194655	-	TSS	TSS	NNNNNNNNNNNNNNNNNNNNNNNNNNNNNNAGAGCATCAGCAAGAGTAGCAGCGAGCAGC	FALSE	FALSE	FALSE	FALSE	FALSE	2	0	23.775	3.105
NM_002524:113	113	NM_002524	chr1:115259403	-	none	TSS	GGACTCAGGCGCCTGGGGCGCCGACTGATTACGTAGCGGGCGGGGCCGGAAGTGCCGCTC	FALSE	FALSE	FALSE	FALSE	FALSE	34	0	25.445	4.35
NM_002657:1	1	NM_002657	chr20:30795546	-	TSS	TSS	NNNNNNNNNNNNNNNNNNNNNNNNNNNNNNACAATGCACCGCACAATGGCCCGACCGCCG	FALSE	FALSE	FALSE	FALSE	FALSE	1	0	19.85	3.945
NM_003339:159	159	NM_003339	chr5:138940909	+	none	TSS	CGCCTCCCGACCTGCCCCTCGGTCGGGCCCACCCCGTGCTCCGACGGCCCCACCCCGGCG	FALSE	FALSE	TRUE	FALSE	FALSE	0	0	14.175	0
NM_003811:28	28	NM_003811	chr19:6531037	+	none	TSS	NNNAAAAAGCGGCGCGCTGTGTCTTCCCGCAGTCTCTCGTCATGGAATACGCCTCTGACG	FALSE	FALSE	FALSE	FALSE	FALSE	76	0	28.505	1.425
NM_003897:4	4	NM_003897	chr6:30712324	-	none	TSS	NNNNNNNNNNNNNNNNNNNNNNNNNNNCTCACTTGGCCTTACACTCCGCTCGGCTCACCA	FALSE	FALSE	FALSE	FALSE	FALSE	792	0	12.55	1.92
NM_004056:1	1	NM_004056	chr8:61193982	-	TSS	TSS	NNNNNNNNNNNNNNNNNNNNNNNNNNNNNNAATTCGCCAGGCGCTCGCTCCCCAGGCCAC	FALSE	FALSE	FALSE	FALSE	FALSE	0	0	14.5	3.77
NM_004215:110	110	NM_004215	chr8:110552413	+	none	TSS	GCGACTGGGAGCGGGACCCAGGCGTGCAGCATTCGCCATGCTCCGCTCACGCGTGGGAGA	FALSE	FALSE	FALSE	FALSE	FALSE	1	0	23.265	1.56
NM_004831:93	93	NM_004831	chr19:16738923	-	none	TSS	TCCTTTGGTGGCGGCGGCGGCCCGGGACCGAGACCCGGCCCCGGCTCCCCTCTCCGCCAC	FALSE	FALSE	TRUE	TRUE	FALSE	0	0	41.255	1.85
NM_005175:7	7	NM_005175	chr17:46970154	+	none	TSS	NNNNNNNNNNNNNNNNNNNNNNNNCAGGACACGTGGGTGGGGGAAGCTGAGCGCTGAGAC	FALSE	FALSE	FALSE	FALSE	FALSE	596	0	11.615	1.365
NM_005333:47	47	NM_005333	chrX:11129452	+	none	TSS	TGCGTGAGAACGCCGGCGGTGACCGCAGCCACAGCGGTGACCGAGTGAGAGGAAGGCGGC	FALSE	FALSE	TRUE	FALSE	TRUE	72	0	12.895	1.765
NM_005481:32	32	NM_005481	chr19:893187	-	none	TSS	AGAAGTCTTTGGGAGGCGGCCCCACGCCTCAGGCGACTGGTTGTTACCGAGGAAGATGGC	FALSE	FALSE	FALSE	FALSE	FALSE	217	0	15.95	1.6
NM_005920:11	11	NM_005920	chr1:156470624	-	none	TSS	NNNNNNNNNNNNNNNNNNNNCTTTCCCCCCACCCCTCAAGCTAGGCTGAGCTGTGCCTAC	FALSE	FALSE	FALSE	FALSE	FALSE	24	0	27.34	2.985
NM_006497:128	128	NM_006497	chr17:1958520	+	none	TSS	ATCCGCCGTCAGCCGGGCCCGGGGCTTTCGACATGCCCCCCAGGAGAGTGTGCTGGGCAG	FALSE	FALSE	FALSE	FALSE	FALSE	0	0	58.17	0
NM_006602:108	108	NM_006602	chr20:61493008	-	none	TSS	GCCGCGCCGCGCCGCCATGTCGGGCCCCGGACCGCGGGAGCCGCCGCCGGAGGCAGGCGC	FALSE	FALSE	FALSE	FALSE	FALSE	0	0	21.78	3.57
NM_012329:12	12	NM_012329	chr17:53499330	-	none	TSS	NNNNNNNNNNNNNNNNNNNGGGCGGGGCGCAGGAGCCCCGGGGCGGAGGAGCCGGGGAGG	FALSE	FALSE	FALSE	FALSE	FALSE	5	0	12.66	0
NM_013233:33	33	NM_013233	chr2:169104073	-	none	TSS	TCCCTCCCCTCCTAGCTGGCTTCGGCGGGGACGGCGGCGGCGGCGGCGGGCGGGGAGGGC	FALSE	FALSE	TRUE	FALSE	FALSE	0	0	20.975	3.77
NM_014145:1	1	NM_014145	chr20:5093733	-	TSS	TSS	NNNNNNNNNNNNNNNNNNNNNNNNNNNNNNACTTCCGGCGCACTGATCCCGCCTGGGGCC	FALSE	FALSE	FALSE	FALSE	FALSE	18	0	19.755	2
NM_014281:18	18	NM_014281	chr8:144911539	-	none	TSS	NNNNNNNNNNNNNTCCGTGCACCGGCACCCAGATCGCGCGAGACAGCGGAAGGAGCAAGA	FALSE	FALSE	FALSE	FALSE	FALSE	70	0	25.59	2.5
NM_015641:57	57	NM_015641	chr7:115850603	+	none	TSS	CGGGTCCGGGCCGCAGGCCCGCTGCGGCGGACTGGGCGGCGGAAGTTCGACGGCGCCGGG	FALSE	FALSE	FALSE	FALSE	FALSE	131	0	23.855	6.805
NM_015885:32	32	NM_015885	chr11:82868168	+	none	TSS	TTTTACCGCACATTTCCCCTCCCCTAGTTCATTTCGCACGACGCAGCGGTTGGGAACACA	FALSE	FALSE	FALSE	FALSE	FALSE	2	0	37.855	10.525
NM_018362:13	13	NM_018362	chr11:27528314	-	none	TSS	NNNNNNNNNNNNNNNNNNCTGTGGGTCTGTAGGTTAAGGGAGAAGATGGCGGCGCTAGGG	FALSE	FALSE	FALSE	FALSE	FALSE	2177	0	15.485	1.04
NM_019007:26	26	NM_019007	chrX:100872966	-	none	TSS	NNNNNCACGTGACCAAGAGCCGCCTAGAGCACAAGTCCTGCTAGTCGCCTCCGTCTGGGT	FALSE	FALSE	FALSE	FALSE	FALSE	72	0	17.585	0
NM_022450:3	3	NM_022450	chr16:122627	-	none	TSS	NNNNNNNNNNNNNNNNNNNNNNNNNNNNGCATTCCCGGGCGGGCCGGACCGGCGGGCGGG	FALSE	FALSE	FALSE	FALSE	FALSE	0	0	30.525	4.38
NM_023079:37	37	NM_023079	chr17:46985767	+	none	TSS	GTCTGGGCTGTGGAAGCGGAGGGGGTGGGGACACTCTGGCCCGGTTCTCGGTGGTGCGGG	FALSE	FALSE	FALSE	FALSE	FALSE	12	0	20.325	0
NM_023933:5	5	NM_023933	chr16:771146	+	none	TSS	NNNNNNNNNNNNNNNNNNNNNNNNNNGGCCACTTCCGGTGTCGCGCGGCGGCTCCCGGCA	FALSE	FALSE	FALSE	FALSE	FALSE	9	0	20.755	3.365
NM_024591:1	1	NM_024591	chr17:78965641	+	TSS	TSS	NNNNNNNNNNNNNNNNNNNNNNNNNNNNNNAGGACCCGAGCTACGGTGGCCGCGGGGCGG	FALSE	FALSE	FALSE	FALSE	FALSE	44	0	15.43	0
NM_031417:135	135	NM_031417	chr19:45754650	+	none	TSS	CGCCCCCATGGCGCCCGGGGTCCCCGCTGCACGGGGCCACTAGGACCCTCGGCGTCCCTT	FALSE	FALSE	FALSE	FALSE	FALSE	0	0	19.04	3.125
NM_032582:92	92	NM_032582	chr17:58469495	-	none	TSS	GGCAGGGGAAGGGGGCGGGGCGGAAGAGTCACGTGATCCGGCATGGAGGCGGTGGCGGCG	FALSE	FALSE	FALSE	FALSE	FALSE	2	0	14.905	0
NM_033088:13	13	NM_033088	chr1:110577235	+	none	TSS	NNNNNNNNNNNNNNNNNNTGTGCGCGAGTTAAGCTGGGGGTGTGGAGCAGCCAAGATGGA	FALSE	FALSE	FALSE	FALSE	FALSE	6	0	18.195	0
NM_033121:1	1	NM_033121	chr12:110437235	+	TSS	TSS	NNNNNNNNNNNNNNNNNNNNNNNNNNNNNNAGAAGTCTGTCCGCGAGCTGTCAGCGCGGG	FALSE	FALSE	FALSE	FALSE	FALSE	11	0	16.22	2.855
NM_133261:65	65	NM_133261	chr19:3585633	+	none	TSS	GAGCAGCGGCCCGGGAGGCCCGGGGGACCGAGACCCCGCGCGCGTCTGCGCCCCCGCCCG	FALSE	FALSE	TRUE	FALSE	FALSE	0	0	37.5	2.485
NM_145686:5	5	NM_145686	chr2:102314169	+	none	TSS	NNNNNNNNNNNNNNNNNNNNNNNNNNGCTCACTCGCTCAACTCGGCGCCGCCGCGGCCCC	FALSE	FALSE	FALSE	FALSE	FALSE	0	0	19.08	1.785
NM_181887:3	3	NM_181887	chr4:103748708	-	none	TSS	NNNNNNNNNNNNNNNNNNNNNNNNNNNNGTAGTTCCGTCAGAGCGGACATCTTGTGGCTG	FALSE	FALSE	FALSE	FALSE	FALSE	17	0	12.895	2.465
NM_201441:33	33	NM_201441	chr12:3068510	+	none	TSS	CCTCCCCGAGGTGCCGGTGGCCCCGCCGCCACTCCCTCCGGCTCCCTCCCTCCCGCCGCG	FALSE	FALSE	FALSE	FALSE	FALSE	0	0	19.75	2.775
NM_206836:1	1	NM_206836	chr6:4135831	-	TSS	TSS	NNNNNNNNNNNNNNNNNNNNNNNNNNNNNNACCCCCGAGCCCCCGCAGCCCTAGAGCCGC	FALSE	FALSE	FALSE	FALSE	FALSE	2	0	33.035	6.165
NR_038170:138	138	NR_038170	chr14:65879585	+	none	TSS	TCCCTCCTCTCCAGGCCCCCTCCCCATCCCACCCCCGCCGCCTGGCCCCAGCCGACCCGT	FALSE	FALSE	FALSE	FALSE	FALSE	0	0	38.51	11.25
NM_025099:5268	5268	NM_025099	chr17:8129943	-	TRMT6/61	tRNA	AATCCATTGGGGTCTCCCCGCGCAGGTTCGAATCCTGCCGACTACGTCATATTTTTTTCT	TRUE	TRUE	TRUE	FALSE	FALSE	0	48.075	76.36	0.5
NM_025099:5643	5643	NM_025099	chr17:8129568	-	TRMT6/61	tRNA	CTGTCTAGTAAACAGGAGATCCTGGGTTCGAATCCCAGCGGTGCCTTTATTCAATTGAAA	TRUE	TRUE	TRUE	FALSE	FALSE	0	39.285	84.01	0.53
NR_026951:659	659	NR_026951	chr17:8126166	-	TRMT6/61	tRNA	TCGCTTCGGGTGCGAGAGGTCCCGGGTTCAAATCCCGGACGAGCCCTCCTTTACCTTTTA	TRUE	TRUE	TRUE	FALSE	FALSE	0	25.19	82.67	0.68
NM_025099:4887	4887	NM_025099	chr17:8130324	-	TRMT6/61	tRNA	GGTGCTAATAACGCCAAGGTCGCGGGTTCGAACCCCGTACGGGCCAGTGGGTGGCTTTTT	TRUE	TRUE	TRUE	FALSE	FALSE	0	24.09	89.185	0.705
NR_026951:1840	1840	NR_026951	chr17:8124202	-	TRMT6/61	tRNA	CTGACTCCAGATCAGAAGGTTGCGTGTTCAAATCACGTCGGGGTCAAACAAAACATTGTT	TRUE	TRUE	TRUE	TRUE	FALSE	0	4.165	77.97	0.255
NM_001199687:2512	2512	NM_001199687	chrX:65816436	-	TRMT6/61	TRMT6/61	AAAGGTTGCCATGTGGCTGGCAGTGGTTCAAGCCCACATTTGACACTGCTGCTCTAGAGG	TRUE	TRUE	TRUE	FALSE	FALSE	0	75	79.79	0
NM_006828:44	44	NM_006828	chr6:101329205	-	none	TRMT6/61	GGCGGTGACGTGTAGGCCGGCGCCAGCTCCACTCTGTCCCTCCTCGCCGGGTCTGTGCGT	FALSE	TRUE	TRUE	FALSE	FALSE	0	38.75	14.665	4.22
NM_001290131:3336	3336	NM_001290131	chr17:27236797	-	none	TRMT6/61	AGACCAGCCTGGGCAACACAGTGAGACCCTATCTCTACAAATAATTTTAAACTTACCCAG	FALSE	FALSE	TRUE	FALSE	FALSE	0	27.835	40.905	8.33
NM_001193375:978	978	NM_001193375	chr19:5892942	-	TRMT6/61	TRMT6/61	ATAGAGTCATTGTTAAACACTCTGGGTTCGAACCCCAGAACTTGATTCTTTCCTTGTTCT	TRUE	TRUE	TRUE	FALSE	FALSE	0	25	96.665	0
NM_000051:11136	11136	NM_000051	chr11:108237815	+	TRMT6/61	TRMT6/61	GCTCACTGAAACCTCTGCCTCCTGGGTTCAAGCAATTCTCCTGCCTCAGCCTCCCGAGTA	TRUE	TRUE	FALSE	FALSE	FALSE	0	19.98	29.1	8.045
NM_001303229:116	116	NM_001303229	chr1:150980982	+	TRMT6/61	TRMT6/61	CGGAGGCCGATTCGCCGTGTGGCGGGTTCGAGTCCCGCCTCCTGACTCTGGCCTCTAGTC	TRUE	TRUE	TRUE	TRUE	FALSE	0	16.665	87.945	1.055
NM_004274:3369	3369	NM_004274	chr14:33204915	+	none	TRMT6/61	CAGGACACAATGGCAGGGCACAGTGGGTCGAGTCCACGTGACCTGCTCTCTCCTGAAAGT	FALSE	TRUE	TRUE	FALSE	FALSE	0	12.5	81.665	3.845
NM_025092:3085	3085	NM_025092	chr11:295505	+	TRMT6/61	TRMT6/61	AGGGACTGGAGCCAGGTGTGCATGGGTTCAAGGCCCTGGCCCTGCCCAGCCTTTGTCTTG	TRUE	TRUE	TRUE	FALSE	FALSE	0	5.88	54.715	1.315
NM_001174063:349	349	NM_001174063	chr8:38326004	-	none	TRMT6/61	GAGCTGGGCGGCCACGTCCGGACGGGACCGAGACCCCTCGTAGCGCATTGCGGCGACCTC	FALSE	FALSE	TRUE	TRUE	FALSE	0	5	51.065	1.92
NM_016605:252	252	NM_016605	chr5:137673955	+	none	TRMT6/61	TAAGGGCACCGTGGGGCGAACCGAGCGCTCAGAGCTGCTCCGGCCGCGGCCCTGGGAGCT	FALSE	FALSE	TRUE	FALSE	FALSE	51	4.545	17.005	4.335
NM_001199434:1215	1215	NM_001199434	chr16:69376050	+	TRMT6/61	TRMT6/61	GGTGTGTGGTATAGAAGAAAAACGGGTTCAAACCCCACTTCTGCCACCTACCAGCTATAT	TRUE	TRUE	TRUE	TRUE	FALSE	0	4.165	66.815	0.72
NM_000276:4970	4970	NM_000276	chrX:128726346	+	TRMT6/61	TRMT6/61	CACCTGCTGTCTTAGGGAAGAAATGGTTCAAATCCATGTGGTGACATTGCATTAGTCTCC	TRUE	TRUE	TRUE	TRUE	FALSE	0	3.57	72.89	0.63
NM_001164479:3405	3405	NM_001164479	chr5:126380525	-	TRMT6/61	TRMT6/61	GTGGGAGTATAGCTTGAGCCCAGGAGTTCGAGACCTGCCTGGGCAATATAGCAAGACCCC	TRUE	TRUE	FALSE	FALSE	FALSE	0	2.17	41.065	0.68
NM_001001795:1055	1055	NM_001001795	chr8:145752480	-	none	TRMT6/61	TCCGGCGCCCTCCGGATTGGCCTGCGCTCGAGACGTCAGGCACTGGCGGCGGGCGCGGGG	FALSE	TRUE	FALSE	FALSE	FALSE	0	2.08	15.485	1.385
NM_015726:708	708	NM_015726	chr1:160209714	-	TRMT6/61	TRMT6/61	CCTGCCCTTCGGGAGCGGGAGCTGGGTTCAAGTGCCCGCTTTGTCTATGAGGCCTGTGGG	TRUE	TRUE	FALSE	TRUE	FALSE	0	2.08	53.105	0
NR_003610:3218	3218	NR_003610	chr16:70011244	-	none	TRMT6/61	GAGAGGGTCCTGCAGGCAGAGCTGGAATCAACTTCCACTCTGCCTCTTGCAAGCTGTGTG	FALSE	FALSE	TRUE	FALSE	FALSE	0	1.92	29.09	2.17
NM_003274:370	370	NM_003274	chr21:45457724	+	TRMT6/61	TRMT6/61	GATGATTCACCTAGAGTCTAACTTTGTTCAATTCAAAGAGGAGCTGCTGCCCAAAGAAGG	TRUE	TRUE	TRUE	TRUE	FALSE	0	1.72	38.65	3.08
NM_012477:278	278	NM_012477	chr2:74686775	+	none	TRMT6/61	GGCACTTCGGGCGCCGCAACAGCAGCTTCGAGAGCTGTGCCCAGGAGTGAACAACCAGCC	FALSE	FALSE	TRUE	TRUE	FALSE	0	1.635	19.45	0
NM_031485:1255	1255	NM_031485	chr19:48954487	+	TRMT6/61	TRMT6/61	CCCTCAAGATCTGGGACCTTCGGCAGTTCAAGTCTGGTTCCCCAGTGGCCACCTTCAAGC	TRUE	TRUE	TRUE	TRUE	FALSE	0	1.4	56.05	0.88
NM_003107:2185	2185	NM_003107	chr6:21596156	+	none	TRMT6/61	TGAGCGAGATGATCTCGGGAGACTGGCTCGAGTCCAGCATCTCCAACCTGGTTTTCACCT	FALSE	TRUE	TRUE	TRUE	FALSE	0	1.02	24.11	3.125
NM_001002021:1869	1869	NM_001002021	chr21:45741739	+	none	TRMT6/61	ACACAGTATACGTGGTGCACGATGGCTTCGAAGGCCTAGCCAAGGGTCAGGTGCAAGAAG	FALSE	FALSE	TRUE	TRUE	FALSE	0	1	44.775	0.7
NM_001199852:3323	3323	NM_001199852	chr9:4710439	-	none	TRMT6/61	AGGCGGGCGGATCACGAGGTCAGGAGATCGAGACCATCCTGGCTAACACGGTGAAACCCC	FALSE	TRUE	FALSE	FALSE	FALSE	0	0.925	15.07	1.72
NM_001080453:5170	5170	NM_001080453	chr7:1516288	-	TRMT6/61	TRMT6/61	TGCTGGGCAAGAGCCGGGAACAGAGGTTCGACCCCTCTGCCTCTCTGGACTTCCTCTGGG	TRUE	TRUE	TRUE	TRUE	FALSE	0	0.6	73.24	1.04
NM_006662:705	705	NM_006662	chr16:30718517	+	none	TRMT6/61	CAGAACAGGCCAAGCATGAGGCCGAGATCGAGACTCGGATTGCTGAGCTGCGGAAGGAGG	FALSE	TRUE	TRUE	TRUE	FALSE	0	0.51	20.54	2.66
NM_001035521:2906	2906	NM_001035521	chr2:27549692	-	TRMT6/61	TRMT6/61	GGTATCTGGGGGGCAGTCAGGGCTGGTTCGAATCCATTTTGTCCGTGGACTCGCCTCCCC	TRUE	TRUE	TRUE	TRUE	FALSE	0	0	67.72	0.98
NM_001039211:1669	1669	NM_001039211	chr1:1391714	+	none	TRMT6/61	CCGCCATGCACAAGCTCTTTGACTGGGCCAATACCAGCCGGCGCGGCCTCCTGCTCTTTG	FALSE	FALSE	TRUE	FALSE	FALSE	0	0	27.28	2.33
NM_001048201:3182	3182	NM_001048201	chr19:4961379	+	TRMT6/61	TRMT6/61	GAAAAGAGGAAACATCTCGGGCCTAGTTCAAACCTTTGCCTCAAAGCCATCCCCCACCAG	TRUE	TRUE	TRUE	TRUE	FALSE	0	0	27.26	1.515
NM_001079866:305	305	NM_001079866	chr2:219525878	+	none	TRMT6/61	TTACATGATCACACTGGAAGTCCCTGCTCGAGACAGGAGCTATGCCTGGTTGCTTAGCTG	FALSE	TRUE	TRUE	TRUE	FALSE	0	0	38.09	0
NM_001098509:2277	2277	NM_001098509	chr17:2278922	+	TRMT6/61	TRMT6/61	TGGTGGAGCAGCAGCATTCCGTGGAGTTCGACTCTCCAGACTCAGGACTGCCCTCCTCTC	TRUE	TRUE	TRUE	TRUE	FALSE	0	0	81.935	0.925
NM_001114093:322	322	NM_001114093	chr19:34685387	+	TRMT6/61	TRMT6/61	AAACTCCACCGTAGCCCTTGCCAAAGTTCGATCCTTTGGTACAGAAGACAGACCGACAGA	TRUE	TRUE	TRUE	TRUE	FALSE	0	0	45.295	0.405
NM_001170536:1155	1155	NM_001170536	chr1:1459762	+	none	TRMT6/61	CCGCCATGCACAAGCTCTTTGACTGGGCCAATACCAGCCGGCGCGGCCTCCTGCTCTTTG	FALSE	FALSE	TRUE	FALSE	FALSE	0	0	25.215	1.32
NM_001185095:2071	2071	NM_001185095	chr9:133997095	+	none	TRMT6/61	AGGGCTGGGAAGAGACAGCCTCCAAGGTCAACACTTGGAGAGGGTTTCACTTGCTCTGAA	FALSE	TRUE	TRUE	TRUE	FALSE	0	0	71.215	1.405
NM_001204298:1530	1530	NM_001204298	chr12:124497244	+	TRMT6/61	TRMT6/61	GAGTGTGGGAAGGCGTTCAGTCAGAGTTCGAGCCTCTGCATCCACCAGAGAGTCCACACT	TRUE	TRUE	TRUE	TRUE	FALSE	0	0	63.98	0.68
NM_001206491:3497	3497	NM_001206491	chr20:3848671	+	none	TRMT6/61	CCACCCCAAGCCGTCAGCCTCCAGGGATCTACACCCTGCCTTGGCTGCTACAGCTTTTTC	FALSE	TRUE	TRUE	TRUE	FALSE	0	0	72.5	2.94
NM_001207009:113	113	NM_001207009	chr19:58874102	-	none	TRMT6/61	GCCCGCCCTCCTACCATTCCACGCGGCTCGAGCCCGCGTGCGGGCCTCTTTCAGGCCGCT	FALSE	TRUE	TRUE	FALSE	FALSE	0	0	78.21	1.135
NM_001303095:2128	2128	NM_001303095	chr1:156692278	-	none	TRMT6/61	AGACGGGCAGATCACGAGGTCAGGAGATCGAGACCATCCTGGCTAACACGGTGAAACCCC	FALSE	TRUE	FALSE	FALSE	FALSE	0	0	45.51	1.47
NM_001306080:189	189	NM_001306080	chr13:76210612	+	TRMT6/61	TRMT6/61	AAGCCAGGTCTTCACGTTCGTGTAGGTTCGAGACCTTAACGAACTGCAGAGCGCAACAAA	TRUE	TRUE	TRUE	TRUE	FALSE	0	0	79.01	0
NM_001552:1387	1387	NM_001552	chr17:38613133	+	none	TRMT6/61	AGGTCTGAGCCCTGGTGTGTTTCCAGATCGATCCTGGATTCACTCACTCACTCATTCCTT	FALSE	TRUE	TRUE	TRUE	FALSE	1	0	73.86	0
NM_001893:2854	2854	NM_001893	chr17:80201388	-	none	TRMT6/61	GTCAGAAGTGAAGCAGCGTGCGTGGGGCCGAGTCCCACCAGAAGGCAGGTGGCCTCCGTG	FALSE	FALSE	TRUE	TRUE	FALSE	0	0	24.195	2.04
NM_004096:944	944	NM_004096	chr10:72181787	+	TRMT6/61	TRMT6/61	GCTAAGCAGCCCTTAGAGGAAAACAGTTCAACTCTGACTTTCCTAGTTGTTTTTTTATTG	TRUE	TRUE	TRUE	TRUE	FALSE	0	0	14.605	0
NM_004295:677	677	NM_004295	chr17:27075386	+	none	TRMT6/61	TGGCCCAGCATGCCACCTCTGAGTGCCCCAAGCGCACTCAGCCCTGCACCTACTGCACTA	FALSE	FALSE	TRUE	TRUE	FALSE	0	0	17.03	0
NM_005768:1692	1692	NM_005768	chr12:7085952	-	none	TRMT6/61	GAATGGAAAAGCCAGGGAGGTGGAAGATCGATGCTTCCAGCTGTGCCTCTGCTGCCAGCC	FALSE	TRUE	TRUE	FALSE	FALSE	0	0	32.755	3.125
NM_014505:653	653	NM_014505	chr12:70760714	+	TRMT6/61	TRMT6/61	TGTCGGTGCAGCAGATCGGCGAGGTGTTCGAGTGCACCTTCACCTGTGGCGCCGACTGCA	TRUE	TRUE	FALSE	TRUE	FALSE	0	0	32.81	1.19
NM_014675:2231	2231	NM_014675	chr1:17272779	+	none	TRMT6/61	CCAAGGCTGAGGCTGGCCGCGTGGAGCTCGAGCTCTCCATGACCAAGCTGAGGGCAGAGG	FALSE	TRUE	FALSE	TRUE	FALSE	0	0	72.985	0
NM_015935:1924	1924	NM_015935	chr1:171761259	+	none	TRMT6/61	CAAAGTCCTGCATTGATGCTGTGGAGATCGATCCCTCCATGTTGGAAGTGGCCACCCAGT	FALSE	TRUE	FALSE	TRUE	FALSE	0	0	32.45	0
NM_018085:4575	4575	NM_018085	chr1:201846581	+	none	TRMT6/61	AACTTGGGAAGCAGAGGTTGCAGTGAACCGATATCACACCGTTGCATTCCAAGGCAAGAC	FALSE	FALSE	TRUE	TRUE	FALSE	0	0	64.38	2.625
NM_019015:1014	1014	NM_019015	chr7:150930588	+	none	TRMT6/61	CAGCCCCTTCAGTAGCCCGCCTGAGGACCGATGCCAGAGGCAGGCATTCTTCCGGAAAGG	FALSE	FALSE	TRUE	TRUE	FALSE	0	0	33.155	2.59
NM_020946:3620	3620	NM_020946	chr9:126143354	-	none	TRMT6/61	CTTCCCCCGGAAGTGTCCCAAGAGGCTCCGAAGGCCTCCCCTCCGAGCCCAGCTCTCCTG	FALSE	FALSE	TRUE	FALSE	FALSE	0	0	33.48	3.845
NM_021727:1571	1571	NM_021727	chr11:61641217	-	none	TRMT6/61	CAGCAACCAAGCCAGCCCCCGGCGGGATCGATACCCTCACCCCTCCACTGGCCAGCCTGG	FALSE	TRUE	TRUE	TRUE	FALSE	0	0	74.43	0.69
NM_144994:881	881	NM_144994	chr2:97505352	-	none	TRMT6/61	GGCCTCCGTGACCCCGGTGCAGCTGGCTCGAGACTGGCAGCGCGGCATCCGGGAGGCCCT	FALSE	TRUE	FALSE	TRUE	FALSE	0	0	56.66	1.515
NM_152478:51	51	NM_152478	chr19:56915744	+	none	TRMT6/61	CTTTGTGAGCGCGGCCGCCGGCCAGGATCGAGCCCTGGCCCGGGCCCTGGCCCAGCCCCG	FALSE	TRUE	TRUE	TRUE	FALSE	0	0	69.04	5
NM_178448:669	669	NM_178448	chr9:139964360	-	none	TRMT6/61	GAGCGGTCCCAGAGCGCGGCGCTGGAACCGAGCTCCAGCGCGGACGCAGGTGCAGTGGCG	FALSE	FALSE	TRUE	TRUE	FALSE	0	0	24.06	0
NR_026752:371	371	NR_026752	chr1:16952969	-	none	TRMT6/61	CCAAGGGTGAGGCTGGCCGCATGGAGCTCGAGCTCTCCGTGACCAAGCTGAGGGCAGAGG	FALSE	TRUE	FALSE	TRUE	FALSE	0	0	50.6	1.16
NM_001190706:210	210	NM_001190706	chr6:62284217	+	none	NUMTs	GCAAAGGTAGCATGATCACTTGTTCCTTAAATAGGGACTTGTATGAATGGCTCGACGAGG	FALSE	FALSE	TRUE	FALSE	FALSE	0	48.255	83.36	1.27
NM_001190470:934	934	NM_001190470	chr5:79945921	-	none	NUMTs	GCAAAGGTAGCATAATCACTTGTTCCTTAAATAGGGACTTGTATGAATGGCTCCACGAGG	FALSE	FALSE	TRUE	FALSE	FALSE	0	39.375	80.99	0.835
NM_001190702:935	935	NM_001190702	chr11:10529789	-	none	NUMTs	GCAAAGGTAGCATAATCACTTGTTCCTTAAATAGGGACTTGTATGAATGGCTCCACGAGG	FALSE	FALSE	TRUE	FALSE	FALSE	0	35.65	79.58	0.845
NM_001190487:917	917	NM_001190487	chr7:142375047	+	none	NUMTs	GCAAAGGTAGCATAATCACTTGTTCCTTAAATAGGGACTTGTATGAATGACCCCACGAGG	FALSE	FALSE	TRUE	FALSE	FALSE	0	28.87	78.43	0.37
NM_001190452:936	936	NM_001190452	chr17:22023372	+	none	NUMTs	GTAAAGGTAGCATAATCACTTGTTCCTTAAATAGGGACTTGTCTGAATGGCTCCACGAGG	FALSE	FALSE	TRUE	FALSE	FALSE	0	17.56	74.82	0.97
NM_001190476:366	366	NM_001190476	chr16:3421918	-	none	NUMTs	GTAAAGGTAGCATAATCACTTGTTCCCTAAATAGGGACTTGTATGAATGGCCACACAAGG	FALSE	FALSE	TRUE	FALSE	FALSE	0	12.5	71.815	0.99
NM_001190708:502	502	NM_001190708	chrX:55208443	-	none	NUMTs	GCAAAGGTAGCATAATCACTTGTTCCTTAAATAGGAACTTGTATGAATGACCACACGAGG	FALSE	FALSE	TRUE	FALSE	FALSE	0	7.415	69.815	0.325
NM_001190706:425	425	NM_001190706	chr6:62284432	+	none	NUMTs	AAAATTTCGGCTGGGGCGACCTCGGAGTATAACCCAACCTCCGAGCAACATATGCTGAGA	FALSE	FALSE	FALSE	FALSE	FALSE	0	2.88	82.07	0.62
NM_001190702:351	351	NM_001190702	chr11:10530373	-	none	NUMTs	AGTCTGGTGATAGCTGGTTGTCCAAGACAGAATCTTAGTTCAACTTTAAATTTACCCACA	FALSE	FALSE	TRUE	FALSE	FALSE	0	1.215	32.055	1.42
NM_001190702:1150	1150	NM_001190702	chr11:10529574	-	none	NUMTs	AAAATTTCGGTTGGGGCGACCTCGGAGCACAATCCGACCTCCGAGCAACACATGCCGAGA	FALSE	FALSE	FALSE	FALSE	FALSE	0	1.105	69.115	0.305
NM_001190452:1349	1349	NM_001190452	chr17:22023785	+	none	NUMTs	AGGACATCCCAATGGTGCAGCCGCTATTAAAGGTTCGTTTGTTCAACGATTAGAGTCCTA	FALSE	FALSE	FALSE	FALSE	FALSE	0	0.825	50.105	0.665
NM_001190470:351	351	NM_001190470	chr5:79946504	-	none	NUMTs	AGTCTGGTGATAGCTGGTTGTCCAAGATAGAATCTTAGTTCAACTTTAAATTTACCCACA	FALSE	FALSE	TRUE	FALSE	FALSE	0	0.795	53.25	0.675
NM_001190452:351	351	NM_001190452	chr17:22022787	+	none	NUMTs	AGCCTGGTGATAGCTGGTTGTCCAAGATAGAATCTTAGTTCAACTTTAAATTTATCTACA	FALSE	FALSE	TRUE	FALSE	FALSE	0	0.74	54.345	0.55
NM_001190470:694	694	NM_001190470	chr5:79946161	-	none	NUMTs	TCAGACCAAAATATTAAACTGACAATTAACAGCCTAATATCTACAACCAACCAACAAGCC	FALSE	FALSE	FALSE	FALSE	FALSE	0	0.57	12.995	0.665
NM_001190702:64	64	NM_001190702	chr11:10530660	-	none	NUMTs	TTAACCAAATCATTTACCCAAATAAAGTATAGGCGATAGAAATTGTAAATCGGCGCAATA	FALSE	FALSE	FALSE	FALSE	FALSE	0	0.405	16.215	0.565
NM_001190487:333	333	NM_001190487	chr7:142374463	+	none	NUMTs	AGCCTAGTGATAGCTGGTTGTCCAAGATAGAATCTTAGTTCAACTTTAAATTTACCTACA	FALSE	FALSE	TRUE	FALSE	FALSE	0	0.32	51.79	0.325
NM_001190470:54	54	NM_001190470	chr5:79946801	-	none	NUMTs	CCAAACAACCTTAACCAAACCATTTACTCAAATAAAGTATAGGCGATAGAAATTGTAAAC	FALSE	FALSE	FALSE	FALSE	FALSE	0	0.3	11.615	0.415
NM_001190452:1151	1151	NM_001190452	chr17:22023587	+	none	NUMTs	AACATTTCGGTTGGGGCGACCTCGGAGTATAACCTAACCTCCGAGCAACATATGCTGAGA	FALSE	FALSE	FALSE	FALSE	FALSE	0	0	33.28	0
NM_001190472:766	766	NM_001190472	chr20:55934113	-	none	NUMTs	GTGCGAAGGTAGCATAATCACTTGTTCTCTAAATAGGGACTTGAATGAATGGCCACACGA	FALSE	FALSE	FALSE	FALSE	FALSE	0	0	15.305	0.615
NM_001190472:768	768	NM_001190472	chr20:55934111	-	none	NUMTs	GCGAAGGTAGCATAATCACTTGTTCTCTAAATAGGGACTTGAATGAATGGCCACACGAAG	FALSE	FALSE	FALSE	FALSE	FALSE	0	0	47.405	0.59
NM_001190489:872	872	NM_001190489	chr10:37890988	-	none	NUMTs	GCAAAAGTAGCATAATCACTTGTTCCCTAAATAGGGACTTGTATGAATGGCCACAGGAGG	FALSE	FALSE	TRUE	FALSE	FALSE	0	0	62.685	0.585
NR_039666:59	59	NR_039666	chr5:134263787	+	none	NUMTs	AGGCCATACGTGTTGGAGATTGAGACTAGTAGGGCTAGGCCTACTGNNNNNNNNNNNNNN	FALSE	FALSE	FALSE	FALSE	FALSE	0	0	63.04	0.51
NR_047469:2818	2818	NR_047469	chr3:87146370	+	none	none	CTTCCTCCTTTAGCTCAGATTAGTTTGATCATCTGAAGCCTTCTTCTCTCAACTCGTCAA	FALSE	FALSE	FALSE	FALSE	FALSE	0	77.5	81.25	0
NM_001256442:458	458	NM_001256442	chr16:29824532	+	none	none	GACCAGCCAGAGGCCCCGCAGCCAGGTCCAAACACCACTGCGGCCCCTGTGGACTCAGGG	FALSE	FALSE	FALSE	FALSE	FALSE	0	75	84.29	0.925
NM_020119:3627	3627	NM_020119	chr7:138731810	-	none	none	TTGGCCTCCCAAAGTGCTAGGATTACAGGTATGAGCCACCATGCCCGGCTGGCAGTTGTA	FALSE	FALSE	FALSE	FALSE	TRUE	0	64.43	38.51	8.71
NM_016558:609	609	NM_016558	chr20:34542673	-	none	none	AGAAGGGGCGCCCGCACGCAAAGGTCACCTACTTTCGCTTCCGGCTGCCGCAGGCGCTTC	FALSE	FALSE	FALSE	FALSE	FALSE	0	50	25.285	3.845
NR_109904:779	779	NR_109904	chr5:57837799	-	none	none	TACTGTGCTTTTCCTATGGGCTTAAAAAACAGCACACCAGGAGATTATATCCCGCACCTG	FALSE	FALSE	FALSE	FALSE	FALSE	0	50	77.375	0
NM_001308197:3495	3495	NM_001308197	chr3:156258205	-	none	none	TTTTTAGTAGAGACGGGGTTTCACCCTGTTAGCCAGGATGGTCTCGATCTCCTGACCTCG	FALSE	FALSE	FALSE	FALSE	FALSE	0	49.995	66.96	19.09
NM_001145160:2471	2471	NM_001145160	chr19:16213654	+	none	none	CTTATCTGAATCCCTTACCCACCCCACCCCACCACCCTACTCCTATTTATTCAGCACCAC	FALSE	FALSE	FALSE	FALSE	FALSE	0	49.165	35.705	10.83
NR_002728:64497	64497	NR_002728	chr11:2656732	-	none	none	ATGGAACAGAACAGAGCCCTCAGAAATAATACCACACATCTACAATCATCTGATCTTTGA	FALSE	FALSE	FALSE	FALSE	FALSE	0	40	29.165	0
NM_001126115:722	722	NM_001126115	chr17:7577098	-	none	none	TGAGGTGCGTGTTTGTGCCTGTCCTGGGAGAGACCGGCGCACAGAGGAAGAGAATCTCCG	FALSE	FALSE	FALSE	FALSE	FALSE	0	31.25	39.82	5.88
NR_024492:1888	1888	NR_024492	chr16:2690870	+	none	none	TGTAACTGCAGCTACTTGGGAGGCTGAGGTAAGAGGATCACTTGAGCCCAGGAAGTCGAG	FALSE	FALSE	FALSE	FALSE	FALSE	0	30.68	46.875	8.33
NR_110383:274	274	NR_110383	chrX:114762065	-	none	none	GCTCTGTTGCCCAGGCTGGAGTGCAGTGGCATGATCATAGCTTACTGCAGCCTCAAATTC	FALSE	FALSE	FALSE	FALSE	FALSE	0	30.215	36.665	5.555
NM_001178141:6230	6230	NM_001178141	chr3:141666349	-	none	none	GAGGCTGAGGCAGGAGAATCACTTGAACCCAGGAGGCGGAGGTTGCAGTGAGCCAAGATC	FALSE	FALSE	FALSE	FALSE	FALSE	0	28.18	30.33	6.785
NM_001170570:1745	1745	NM_001170570	chrX:118672651	-	none	none	CACGCCTGTAATCCTAGCAGTTTGGGAGGCAGAGGCGGGCAGATTGCCTGAGCTCAGGAG	FALSE	FALSE	FALSE	FALSE	FALSE	0	26.875	20.03	2.63
NM_014389:201	201	NM_014389	chr17:4607432	-	none	none	GCCGTCGCGGTGTGTTTGCGTCATCGCGCCACGCCACCACTGGAACCCGGGGGAAGATGG	FALSE	FALSE	FALSE	FALSE	FALSE	18	26.665	25.84	6.925
NM_144994:1145	1145	NM_144994	chr2:97505088	-	none	none	CAGGCAAAGAGAGAGGCCTCCCTGGCTTCGAGTGTCAGGGGAGCCGCGTTCCCTCCCAGG	FALSE	FALSE	FALSE	FALSE	FALSE	0	25	57.775	0
NR_024496:231	231	NR_024496	chr9:66494499	+	none	none	CAGCACACACCCAGGGGACACCGCGAAGGCAGAGCAGCGTTCTCCTCAGCACAGACCTTG	FALSE	FALSE	FALSE	FALSE	FALSE	0	25	39.39	0
NM_001282334:293	293	NM_001282334	chr19:1076925	+	none	none	TTTTTAATTTTTTTGTAGAGATGGGGTCTCACTATGTTGACCAGGCTGGTCTCAAACTCC	FALSE	FALSE	FALSE	FALSE	FALSE	0	24.865	42.895	0
NR_033684:1519	1519	NR_033684	chr12:120898729	+	none	none	TCGGGAGGCTGAGGCAGGAGAATGGCGTGAACCCGGGAGACGGAGCTTGCAGTAAGCCGA	FALSE	FALSE	FALSE	FALSE	FALSE	0	22.62	28.4	4.835
NM_014977:479	479	NM_014977	chr14:23564345	-	none	none	AAATTACCGAAGATGCCCGAAGCCGTCGGGACGGACCCGAGTACCTCACGCAAGATGGCG	FALSE	FALSE	FALSE	FALSE	FALSE	1056	22.5	20	3.575
NM_207115:243	243	NM_207115	chr19:56153947	+	none	none	TCTCCGGAGGCCATGGACCCACCGCCCCCCAAGGCTCCCCCTTTCCCCAAGGCGGAAGGC	FALSE	FALSE	FALSE	FALSE	FALSE	0	22.41	18.695	5.085
NM_001145437:1140	1140	NM_001145437	chr21:47635176	-	none	none	TCAACCTGTATGAGCACCACCACAGTGCCCACCTGCGGCAGCGGGCCGTGCAGAAGCTGT	FALSE	FALSE	FALSE	FALSE	TRUE	0	22.045	48.075	12.435
NM_001098786:677	677	NM_001098786	chr7:128097851	+	none	none	CTGGGTGTGGTGGCAGAGGCCTGTAATCCCAGCTCCTTGGGAGGCTGAGGCGGGAGAATT	FALSE	FALSE	FALSE	FALSE	FALSE	0	20.26	19.375	5.295
NM_022344:4180	4180	NM_022344	chr17:30655863	-	none	none	TCTGTCACCCAGGCTGGAGTGTGGTGGTGCAATCTTGGCTCACTGCAACCTCTGCCTCCC	FALSE	FALSE	FALSE	FALSE	FALSE	0	20	46.02	11.805
NM_001278715:379	379	NM_001278715	chr3:184081149	+	none	none	CGCGTTACCGCTTGTTTGTGCGCATGCGCCACTCTCGTCTGGCCGCCGCGCTTTCAGGAG	FALSE	FALSE	FALSE	FALSE	FALSE	9	19.545	24.79	7.29
NM_016272:227	227	NM_016272	chr22:41842801	-	none	none	TAAGGGTGAAACTTTTCATTGACTTTGCTCACTTCGGGCCGGGGCGCGGGAAGGTGCGGG	FALSE	FALSE	FALSE	FALSE	FALSE	0	19.44	14.535	3.175
NM_001640:350	350	NM_001640	chr3:49711784	+	none	none	GCCGTCCCAGGCTCCGCCCCCGGAAGCCTCACTTCCGGGCGCGAGCACGCCCCGCCTCGC	FALSE	FALSE	FALSE	FALSE	FALSE	0	18.57	15.815	2.165
NM_001301243:1074	1074	NM_001301243	chr17:79826564	-	none	none	CCGACCCCCCTCCTCAGCCCTCCCCCACCCACAGGCCCAGCCTCCTCGGTCTCCTGTCTC	FALSE	FALSE	FALSE	FALSE	FALSE	0	17.77	17.345	3.96
NR_046312:1365	1365	NR_046312	chr22:30771040	-	none	none	GAGGCTGAGGCAGGAGAATCACTTGAACCCAGGAGGTGGAGGTTGCAGTGAGCAGAGATT	FALSE	FALSE	FALSE	FALSE	FALSE	0	17.54	22.065	3.915
NR_073022:226	226	NR_073022	chr19:49122450	-	none	none	GGCGCCACTCGCTTGAGGCTTTCCCCGCCCACCCCAGCCCGTTCTCTCTTTCCGGACCTG	FALSE	FALSE	FALSE	FALSE	FALSE	0	17.14	34.47	3.835
NM_001304349:1939	1939	NM_001304349	chr19:14203675	-	none	none	CCTCTCCCACTTTTCCCTTCCTCTTTCCCCACAGCCCCCCAGCCCCTCAGCCCTCCCAGC	FALSE	FALSE	FALSE	FALSE	FALSE	0	16.99	24.515	3.33
NM_001242902:1270	1270	NM_001242902	chr17:55183813	+	none	none	AATGAGGAGGGCTTGGATAGAAATGAGGAGAGCTTGGATAGAAATGAGGAGGGCTTGGAT	FALSE	FALSE	FALSE	FALSE	TRUE	1	16.755	17.78	3.44
NR_103455:473	473	NR_103455	chr6:28104622	-	none	none	CCTTTTTCAGTTCTCTCGCGACCTCTAGCCACTTCCGGTTGCTAACGGTTCCCAAACAGC	FALSE	FALSE	FALSE	FALSE	FALSE	3	16.665	15.985	2.67
NR_024492:1889	1889	NR_024492	chr16:2690871	+	none	none	GTAACTGCAGCTACTTGGGAGGCTGAGGTAAGAGGATCACTTGAGCCCAGGAAGTCGAGG	FALSE	FALSE	FALSE	FALSE	FALSE	0	15.34	39.58	4.165
NR_024537:282	282	NR_024537	chr1:110282938	-	none	none	TATAAAGCCCCTCCCGCTCACAGTTTCCCTAGTCCTCGAAGGCTCGGAAGCCCGTCACCA	FALSE	FALSE	FALSE	FALSE	FALSE	29	14.655	15.825	3.725
NM_020715:4797	4797	NM_020715	chr14:68054512	+	none	none	CTCGAACTCCTGACCTCAGGTGATCTGCCCACTTTGGCCTCCCAAAGTGCTGGGATTACA	FALSE	FALSE	FALSE	FALSE	FALSE	0	13.94	25.59	7.34
NM_031844:6094	6094	NM_031844	chr1:245014354	-	none	none	AATCCTAGCACTTTGGGAGGCCAAGGCGGGAGGATCACTTGAGCTCAGGAGTTTGAGACC	FALSE	FALSE	FALSE	FALSE	FALSE	0	13.54	24.205	6.475
NM_005811:1323	1323	NM_005811	chr12:56143728	+	none	none	CCCTACCCCAAGACCCCTAGCCCTGCCCCCATCCCCCCAAGCCCTAGAGCTCCCTCCACT	FALSE	FALSE	FALSE	FALSE	FALSE	0	13.39	29.36	8.82
NM_004053:273	273	NM_004053	chr6:41889237	+	none	none	GGCCTCTTGGGCGCTGGGAGTCCACCGCGCAAGCGCATCCTGGCCTTTCTTCAGTCCCCA	FALSE	FALSE	FALSE	FALSE	FALSE	221	11.76	17.65	4.06
NM_001282674:216	216	NM_001282674	chrX:102631466	+	none	none	CAGAGCGACGCAGCCTTCGGTGCAGTCGTCACTCGCGTCTGGCTACCAGCTCCCCGCTGC	FALSE	FALSE	FALSE	FALSE	FALSE	73	11.255	16.685	4.02
NM_006135:380	380	NM_006135	chr1:113162454	+	none	none	CCTGCCTCGCGCCCGTAGCCGGGCTGGGCCAGAACAGCCCAAGATGGCCGACTTCGATGA	FALSE	FALSE	FALSE	FALSE	FALSE	1596	10.595	14.26	2.84
NM_005523:1390	1390	NM_005523	chr7:27222039	-	none	none	CCTCCCTCTACTGGGAGCCTACCCACCCCCAGGACCCCTGAGTAAAAAAGCTGTGTGCTC	FALSE	FALSE	FALSE	FALSE	FALSE	0	10.355	13.55	1.385
NR_073502:3327	3327	NR_073502	chr1:16724325	+	none	none	CTGCCCCGCCCAGCCCTGCCCTGCCCAGCCATACCCTGCTCTGCCCCATCTGGGGGTGCC	FALSE	FALSE	FALSE	FALSE	FALSE	0	10.27	18.925	2.27
NR_121644:3164	3164	NR_121644	chr4:190988820	+	none	none	CCTCCCCCCCCCCCCCCCCCCCCCACCACCACCACCCCGCCGGCCGGCCCCAGGCCTCGA	FALSE	FALSE	FALSE	FALSE	FALSE	0	10.18	28.635	7.685
NM_006023:227	227	NM_006023	chr10:12238187	+	none	none	GCTCGGCGGGCACTTCCGGGGCCGGCGCCCAGAGTTCCGGGAGGGTGCAGGCAGGAGAGG	FALSE	FALSE	FALSE	FALSE	FALSE	732	9.165	17.1	4.045
NM_004884:468	468	NM_004884	chr15:65667628	-	none	none	CTGCAGGGTGGAGGGGACCCCTCCAGTGCGAATCACCTGGAGGAAGAATGGGGTAGAGCT	FALSE	FALSE	FALSE	TRUE	FALSE	0	8.33	56.66	1.19
NM_002439:4010	4010	NM_002439	chr5:80172197	+	none	none	ATCCCAGCACTTTGGGAGGCCAAGGTAGGCAGATCACCTGAGGTCAGGAGTTCAAGACCA	FALSE	FALSE	FALSE	FALSE	FALSE	0	8.305	19	4.44
NM_002406:208	208	NM_002406	chr5:180229841	-	none	none	CCGCCCCGCCCCGCCTGCCGGGGAAGGGCCACGTTGCCCGCCCGGCCGTCCGGCCCCGGC	FALSE	FALSE	FALSE	FALSE	FALSE	5	7.14	13.805	1.8
NM_001114403:1070	1070	NM_001114403	chr7:102277744	-	none	none	CCTCACGGGTTCAAGCGATTTTCCTGCTTCAGCCTCCTGAGTAGCTGGGACTACAGGCAC	FALSE	FALSE	FALSE	FALSE	FALSE	0	7.095	21.32	2.17
NR_024461:2744	2744	NR_024461	chr17:40906460	-	none	none	AATTATCTGGGCCTGGTGATGTGTGCCTGTAGTCCCAGCTACTTGAGAGGCTGAGGTGGG	FALSE	FALSE	FALSE	FALSE	FALSE	0	6.79	17.325	3.465
NM_014726:1429	1429	NM_014726	chr17:45776087	+	none	none	AGCCCACCGCCAGCCCCCGCCCCTCCCTGCACTGATTTAGACCTGCACTACCTGGCACTG	FALSE	FALSE	FALSE	FALSE	FALSE	0	5.97	18.915	3.125
NM_003370:948	948	NM_003370	chr19:46025725	+	none	none	GGTCCCAGCTGCAGCGCACGGAGCAGGGGGAGGACCACCCCCTGCACCCCCTCTCCCGGC	FALSE	FALSE	FALSE	FALSE	FALSE	0	5.88	13.885	0
NM_001304547:1107	1107	NM_001304547	chr19:17535871	+	none	none	CTCCCCGCCAGCCTGGGGCCACCCCCCCTCACTGCATCCTGGGGCCACCCCCACTCACTG	FALSE	FALSE	FALSE	FALSE	FALSE	0	5.795	12.79	0
NR_026581:330	330	NR_026581	chr12:6862307	-	none	none	GCCCCGGGTGGGCGGGTCTATCGTGACGTCACTTCCGCCCGGGCCTGGCCGAGGTTCGGG	FALSE	FALSE	FALSE	FALSE	FALSE	6	5.555	17.38	4.91
NM_000791:2538	2538	NM_000791	chr5:79923424	-	none	none	AACCAGCCAGGCACAGTGGCTCACACCTGTAATCCCAGCGCTTTGGGAGGCTAAGGCAGG	FALSE	FALSE	FALSE	FALSE	FALSE	0	5.045	20.69	0
NM_001143973:216	216	NM_001143973	chr10:97453685	-	none	none	TGGCAATGCGATTGGAGACCGCGGAGGCCTACGTCGGACCCGGAGGCCCTGAATGCCCCA	FALSE	FALSE	FALSE	FALSE	FALSE	94	5	17.135	3.01
NM_021203:247	247	NM_021203	chr3:133524654	+	none	none	GCTCCCCGCGCCTGCGCAGAGTGCAGGGCCACGTCGCTTTTGCTGTACCGGGGACCACGC	FALSE	FALSE	FALSE	FALSE	FALSE	233	4.545	14.53	1.905
NM_001286627:299	299	NM_001286627	chr16:2318115	-	none	none	GGCGACTTCCCGCTCCTTGACTCTGACGTCAGAGCGGCGCCGGCCTCGGCGGCTGAGGAA	FALSE	FALSE	FALSE	FALSE	FALSE	6	4.165	19.765	4.57
NM_182607:2455	2455	NM_182607	chrX:107321741	+	none	none	TTGGGAGGCTGAGGCAGGAGAATCGCTTGAACCCAGGAGGTGGAGGTTGCAGTGAGCCGA	FALSE	FALSE	FALSE	FALSE	FALSE	0	4.165	13.515	3.065
NR_038406:1870	1870	NR_038406	chr8:74353555	+	none	none	AGCACTTTGGGAGGCTGAGGCAGGCAGATCACCTGAGGTCAGGAGTTTGAGACCAGCCTG	FALSE	FALSE	FALSE	FALSE	FALSE	0	3.44	28.18	6.73
NM_001032296:316	316	NM_001032296	chr13:99229090	-	none	none	GCGGCCCGCGGGCCTCGCCGCCCCGCGCGGATCGTCGCGGCCCGGCCGTCCCGTCCCAGG	FALSE	FALSE	FALSE	FALSE	FALSE	0	3.33	13.005	0
NM_001271953:413	413	NM_001271953	chr18:34408767	-	none	none	CCTCGGCGCTGAGGCGGGGTCCGGCCCTCCACCCGCTCCCGCCGCGCGCGAATCGCGGTC	FALSE	FALSE	FALSE	FALSE	FALSE	10	3.33	19.615	2.08
NM_001198793:535	535	NM_001198793	chr3:9834766	+	none	none	CGCGAAAGGGCAGGCATCGCGGGGCTGGCCACTTCCGTACTTCCGCTTTCCGGCCCAGCC	FALSE	FALSE	FALSE	FALSE	FALSE	7	3.125	15.235	1.49
NM_001243028:1719	1719	NM_001243028	chr19:40739675	-	none	none	TTAGCCTTTTTGGTTTGTGTCCCCACCCCCACCTCCTCACCCCCTTTCCAGTTCTTCTTC	FALSE	FALSE	FALSE	FALSE	FALSE	0	3.125	20.52	4.88
NM_024881:2499	2499	NM_024881	chr19:16663242	-	none	none	TCAGGCTGCTGAGGCAGGCGAATTGCTTGAACCTGGGAGGCAGAAGTTGTGGTGAGCCGA	FALSE	FALSE	FALSE	FALSE	FALSE	0	2.94	17.81	5.24
NM_001113182:1716	1716	NM_001113182	chr6:32942311	+	none	none	AGAAGCAGCAGCACCAGGGAAGAGGATTCGAAAACCCTCTCTCTTGTATGAGGGCTTTGA	FALSE	FALSE	FALSE	TRUE	FALSE	0	2.67	77.82	0.44
NM_004491:4387	4387	NM_004491	chr19:47503832	+	none	none	TCTGCCGTGGCTTCCACCGTCCCCTTCCTCACTTCCACGCCTGTCACAAGTCAGCCGTCG	FALSE	FALSE	FALSE	FALSE	FALSE	0	2.38	12.41	0
NM_006462:344	344	NM_006462	chr20:389037	+	none	none	AGAGGGCTTTGCCTTGAAACCCGGGACGCCAGGGGCGCTCCCGCAAGTGGGGGTCCTCCG	FALSE	FALSE	FALSE	FALSE	FALSE	2	2.17	22.645	3.025
NM_005027:2968	2968	NM_005027	chr19:18280345	+	none	none	GCCCCTGTCTCTCTCCATGTTGGGGGTCCTAACTCCCCCACCCCATATCTACGTGTCCTC	FALSE	FALSE	FALSE	FALSE	FALSE	0	1.85	15.83	0
NM_006122:1236	1236	NM_006122	chr15:91450545	+	none	none	AGTTCATGTGGAGGCAGACATGGGACTCGGACTCCAGCACAGACATCTTCTGTCACATGA	FALSE	FALSE	FALSE	FALSE	FALSE	0	1.72	45.11	1.35
NM_001537:967	967	NM_001537	chr16:83845585	+	none	none	TCACTGCTCTGTTGCCAAAACTCAGAATAGAACTTAGACGTATGTCTGAGTCCCTGAGAT	FALSE	FALSE	FALSE	FALSE	FALSE	0	0.675	21.405	0
NM_001098534:1987	1987	NM_001098534	chr6:31610714	-	none	none	TCAGTTCTCTCAGCTTCTGGGGAACCTGCTAGGGCCTGCAGGGCCAGGGGCTGGAGGGTC	FALSE	FALSE	FALSE	FALSE	FALSE	0	0	19.11	2.125
NM_001278342:517	517	NM_001278342	chr12:122710599	-	none	none	TGCCCCGCTCCGCGCTCACGAAGCTGCGTCACTTCCGGCGTGTGCGTCTGGCGTCCGCGC	FALSE	FALSE	FALSE	FALSE	FALSE	31	0	19.415	1.85
NM_001281723:394	394	NM_001281723	chr3:15643252	+	none	none	GCCAGAATGCCAGAGGGAGGCGGGACTAGCAGGAGATTGCTGCCTATGCAAAGCAGATTT	FALSE	FALSE	FALSE	FALSE	FALSE	62	0	31.38	4.015
NM_015833:4976	4976	NM_015833	chr21:46644427	+	none	none	CTGGGAGCCCTGGGTGGGGCAGCTGTGGGGAGGAACTGGGTTCGGGGAGCCCTGGGCGGG	FALSE	FALSE	FALSE	FALSE	FALSE	0	0	30.55	4.545
NM_025160:568	568	NM_025160	chr1:224621434	-	none	none	AGAAGAAGAAGCGGCTCTCCCAGTCAGATGAGGATGTCATTAGGCTAATAGGACAGCACT	FALSE	FALSE	FALSE	FALSE	FALSE	0	0	12.895	1.47
NR_037717:1028	1028	NR_037717	chr17:6918073	+	none	none	GTTGAGCCTATCCGCTGCGGGGAGGGCGGGACTTCCTGCGCGGGGGCCCGAGCCGCTCAG	FALSE	FALSE	FALSE	FALSE	FALSE	21	0	17.79	3.065
